# Supplementary material for: Identification of Diagnostic Biomarkers of Rape Pollen Allergy Based on MRNA Sequencing
Source: Hindawi journal article supplement (doi:10.1155/2022/6153577), 2022-09-28
Supplement: f1 [file 6153577.f1.zip]

Archive with 8 entries (8 files):
- 6153577.f1/Table S1.docx
- 6153577.f1/Table S2.docx
- 6153577.f1/Table S3.docx
- 6153577.f1/Table S4.docx
- 6153577.f1/Table S5.docx
- 6153577.f1/Table S6.docx
- 6153577.f1/Table S7.docx
- 6153577.f1/Table S8.docx
