# Supplementary material for: Identification of Diagnostic Biomarkers of Rape Pollen Allergy Based on MRNA Sequencing
Source: Hindawi journal article supplement (doi:10.1155/2022/6153577), 2022-09-28
Supplement: f1 [file 6153577.f1.zip › 6153577.f1/Table S1.docx]

| Table S1: DEGs between the rape pollen allergic group and rape pollen non-allergic group | | | | | | |
| --- | --- | --- | --- | --- | --- | --- |
| **Symbol** | **baseMean** | **log2FoldChange** | **lfcSE** | **stat** | **pvalue** | **padj** |
| HES4 | 19.50116805 | -1.400607947 | 0.507194613 | -2.761480332 | 0.005753998 | 0.048044183 |
| AJAP1 | 17.11708662 | -1.255929756 | 0.492723349 | -2.548955226 | 0.010804617 | 0.071012553 |
| CTRC | 20.43051184 | -1.321667366 | 0.367601019 | -3.595385485 | 0.000323912 | 0.007592552 |
| ALPL | 90.2447832 | 1.71445062 | 0.855658031 | 2.003663331 | 0.045106137 | 0.17404777 |
| C1QC | 8.322106457 | -1.754018057 | 0.610056525 | -2.875173011 | 0.004038062 | 0.038552833 |
| TENT5B | 6.000385988 | -1.409919284 | 0.511563481 | -2.756098385 | 0.00584954 | 0.048611812 |
| SPOCD1 | 58.4535042 | 1.12748593 | 0.380982662 | 2.959415332 | 0.003082234 | 0.032385258 |
| FOXO6 | 3.303684612 | -2.469449979 | 0.830438483 | -2.973669969 | 0.002942614 | 0.031314648 |
| MPL | 120.5542743 | 1.048189925 | 0.387330378 | 2.706190849 | 0.006805992 | 0.053236892 |
| AL357673.1 | 0.880475172 | -2.344731462 | 1.118192837 | -2.096893652 | 0.036002991 | NA |
| JUN | 7754.209149 | -1.805815001 | 0.295504535 | -6.110955278 | 9.90E-10 | 4.66E-07 |
| PTGER3 | 100.0449544 | 1.919923978 | 0.577047904 | 3.327148345 | 0.000877397 | 0.014463718 |
| AC093155.3 | 3.146180653 | 1.317770024 | 0.648676024 | 2.031476383 | 0.042206693 | 0.167721386 |
| BRDT | 2.558362668 | 1.824210293 | 0.907020714 | 2.011211282 | 0.044303145 | NA |
| F3 | 45.04955162 | 1.492683573 | 0.686295347 | 2.174987169 | 0.029631078 | 0.134061112 |
| SLC44A3 | 3.509379189 | 1.658567905 | 0.839163927 | 1.976452814 | 0.048103515 | 0.181300401 |
| PIFO | 5.649343223 | -1.64873555 | 0.517616624 | -3.18524459 | 0.001446317 | 0.019989207 |
| RORC | 136.9461682 | 1.071534684 | 0.241886579 | 4.429905481 | 9.43E-06 | 0.00059655 |
| AQP10 | 45.87824766 | 1.277448046 | 0.48589735 | 2.629049212 | 0.008562397 | 0.061269768 |
| GBA | 13.91994377 | -1.363114849 | 0.507075904 | -2.688186989 | 0.007184115 | 0.054856505 |
| LMNA | 944.9045851 | -1.033985121 | 0.218875941 | -4.724069333 | 2.31E-06 | 0.000234185 |
| BCAN | 2.129132057 | 1.669523885 | 0.850889885 | 1.962091587 | 0.049751822 | NA |
| PEAR1 | 280.4371785 | 1.228013641 | 0.338083981 | 3.632273961 | 0.000280935 | 0.006858596 |
| ETV3L | 0.995808345 | 2.500081188 | 1.069277405 | 2.338103447 | 0.019381882 | NA |
| OR6K3 | 2.448017074 | 1.52018813 | 0.707937062 | 2.147349266 | 0.031765486 | NA |
| IGSF9 | 40.42613199 | -1.921308963 | 0.413189896 | -4.649941783 | 3.32E-06 | 0.000300337 |
| FCGR2B | 279.3646423 | 1.027605146 | 0.321409111 | 3.197187354 | 0.001387748 | 0.019562943 |
| FCGR3B | 592.7323474 | 1.904083686 | 0.739246393 | 2.575709133 | 0.010003476 | 0.067443405 |
| SELP | 769.2451872 | 1.189142507 | 0.407515696 | 2.918028728 | 0.003522519 | 0.035179749 |
| CRB1 | 4.955147948 | -1.06453266 | 0.469085665 | -2.269377941 | 0.023245352 | 0.115865478 |
| NR5A2 | 1.924296121 | 1.768658164 | 0.809722682 | 2.184276424 | 0.028941942 | NA |
| PHLDA3 | 4.780292707 | 1.142317784 | 0.509618912 | 2.241513724 | 0.024992818 | 0.121402289 |
| SLC45A3 | 137.4868182 | 1.022207 | 0.276845251 | 3.692340747 | 0.000222199 | 0.005860667 |
| C1orf116 | 47.02780532 | 1.132910498 | 0.388588918 | 2.915447266 | 0.003551791 | 0.035345082 |
| CR1L | 7.355393626 | 1.010605728 | 0.503841686 | 2.005800146 | 0.044877575 | 0.173735929 |
| ATF3 | 708.7268997 | -1.719892981 | 0.26976337 | -6.375561601 | 1.82E-10 | 1.12E-07 |
| TGFB2 | 39.05285832 | 1.56749252 | 0.440913743 | 3.555100166 | 0.000377835 | 0.008337572 |
| DUSP10 | 1398.398798 | -1.632415323 | 0.222760528 | -7.328117488 | 2.33E-13 | 8.23E-10 |
| OR2L13 | 6.101107063 | 1.402466591 | 0.62799675 | 2.233238612 | 0.025533213 | 0.123148458 |
| MYCN | 5.127946922 | -1.448588319 | 0.572042888 | -2.532307192 | 0.011331467 | 0.073415211 |
| RHOB | 1287.984598 | -1.213234528 | 0.268972521 | -4.510626305 | 6.46E-06 | 0.000467548 |
| MFSD2B | 71.83721114 | 1.004177326 | 0.3606494 | 2.784358791 | 0.005363367 | 0.045629491 |
| CGREF1 | 1.813271106 | 2.662566409 | 1.009772177 | 2.636799141 | 0.008369237 | NA |
| LTBP1 | 1160.924808 | 1.146077246 | 0.439613453 | 2.607011317 | 0.009133634 | 0.063514952 |
| LGALSL | 668.1623157 | 1.150232469 | 0.420944197 | 2.732505823 | 0.006285456 | 0.050682326 |
| IL1R2 | 83.63897532 | 1.290924963 | 0.654841757 | 1.971354072 | 0.048683391 | 0.182608007 |
| LIMS3 | 1.249289668 | 2.42445212 | 1.008761154 | 2.403395601 | 0.016243604 | NA |
| MARCO | 62.57106983 | -1.06325442 | 0.370808981 | -2.867391226 | 0.00413871 | 0.039142992 |
| POTEI | 1.270601061 | 2.470718973 | 1.018289015 | 2.426343539 | 0.015251825 | NA |
| RND3 | 1.762115665 | -2.22322877 | 1.094132955 | -2.031954855 | 0.042158226 | NA |
| GALNT5 | 16.28566865 | -1.074854978 | 0.366316852 | -2.934222035 | 0.003343849 | 0.033933693 |
| SLC4A10 | 322.9317649 | 1.050632146 | 0.327626781 | 3.206795681 | 0.001342223 | 0.019131421 |
| KCNH7 | 4.004058542 | 1.375275958 | 0.513730472 | 2.677037929 | 0.007427623 | 0.056018804 |
| B3GALT1 | 1.461518857 | -2.257869391 | 0.999330985 | -2.259380952 | 0.023859698 | NA |
| NOSTRIN | 4.042283705 | -1.504914952 | 0.569524751 | -2.642404828 | 0.00823196 | 0.059753695 |
| CCDC173 | 39.74977103 | -2.28993644 | 0.340162071 | -6.731898225 | 1.67E-11 | 1.48E-08 |
| MYO3B | 77.55859036 | 1.311943174 | 0.351999439 | 3.727117225 | 0.000193682 | 0.005398542 |
| MPP4 | 1.818617546 | -1.947780424 | 0.855004489 | -2.278093797 | 0.02272099 | NA |
| GPR1 | 5.261877809 | 1.677161159 | 0.61059539 | 2.746763548 | 0.006018651 | 0.049463705 |
| CXCR2 | 415.3876736 | 1.292365128 | 0.514547511 | 2.511653641 | 0.012016696 | 0.076208438 |
| CXCR1 | 234.1420249 | 1.542412245 | 0.528416604 | 2.918932209 | 0.003512326 | 0.035125749 |
| PRKAG3 | 7.785194916 | -1.423349502 | 0.58581704 | -2.429682657 | 0.015112048 | 0.08793654 |
| SLC23A3 | 31.29305477 | 1.221735221 | 0.260183424 | 4.69566894 | 2.66E-06 | 0.000256835 |
| TM4SF20 | 5.40681727 | 1.445964608 | 0.655988799 | 2.20425198 | 0.027506628 | 0.128272513 |
| COL6A3 | 106.4858401 | 1.064187702 | 0.322179608 | 3.303088322 | 0.000956263 | 0.015247257 |
| CNTN4 | 1.371757759 | 3.038063962 | 1.033549701 | 2.939446414 | 0.003287991 | NA |
| CTDSPL | 512.9786239 | 1.025067531 | 0.372188314 | 2.754163665 | 0.005884233 | 0.048813885 |
| XIRP1 | 1.116138614 | 2.701016919 | 1.10610078 | 2.441926602 | 0.014609116 | NA |
| TMEM158 | 35.99184225 | 1.050841617 | 0.430627827 | 2.440254789 | 0.014676906 | 0.086114474 |
| CCR5 | 423.6342632 | 1.062735361 | 0.229577503 | 4.629091906 | 3.67E-06 | 0.000323912 |
| KIF9 | 89.76048517 | -1.196336953 | 0.178696827 | -6.694785649 | 2.16E-11 | 1.60E-08 |
| CISH | 323.0319611 | 1.132714833 | 0.47555705 | 2.381869499 | 0.017225 | 0.095318424 |
| DCAF1 | 16.97315267 | -2.378393652 | 0.642073198 | -3.70424067 | 0.000212025 | 0.005687991 |
| PROS1 | 273.3075152 | 1.248020854 | 0.458616553 | 2.721273026 | 0.006503103 | 0.051683362 |
| DRD3 | 2.274561053 | 1.642236673 | 0.790292479 | 2.078011264 | 0.037708322 | NA |
| PLA1A | 25.47705358 | -1.486919051 | 0.419801833 | -3.541954639 | 0.000397174 | 0.008582724 |
| ITGB5 | 440.2283591 | 1.155115451 | 0.410002871 | 2.817335027 | 0.004842398 | 0.043148003 |
| RAB6B | 151.7397337 | 1.194240668 | 0.227991986 | 5.238081785 | 1.62E-07 | 3.16E-05 |
| KY | 36.93713447 | 1.479035079 | 0.540640797 | 2.735707492 | 0.006224633 | 0.050364562 |
| ARHGEF26 | 33.19600286 | 1.208726809 | 0.235071283 | 5.141958621 | 2.72E-07 | 4.41E-05 |
| MME | 276.8944277 | 1.527530411 | 0.74800526 | 2.042138596 | 0.041137785 | 0.164773003 |
| VEPH1 | 119.4557945 | 1.021794957 | 0.353826154 | 2.887844622 | 0.003878914 | 0.037541399 |
| MLF1 | 35.1470642 | -1.655907465 | 0.265064522 | -6.247186363 | 4.18E-10 | 2.11E-07 |
| ACTRT3 | 1.091741211 | -2.225073138 | 1.062908297 | -2.093382038 | 0.036315065 | NA |
| LIPH | 48.32702095 | 1.058002725 | 0.312748204 | 3.382921827 | 0.00071719 | 0.012683207 |
| ETV5 | 21.14642787 | -1.173937344 | 0.337951408 | -3.473686791 | 0.00051336 | 0.01006404 |
| PLAAT1 | 12.67157327 | 1.068868854 | 0.437732886 | 2.441828998 | 0.014613067 | 0.085864111 |
| CFAP99 | 4.150662564 | -1.138281418 | 0.499088976 | -2.280718414 | 0.022565115 | 0.11372012 |
| CYTL1 | 3.76124673 | -2.057818263 | 0.624598797 | -3.294624121 | 0.000985534 | 0.015608161 |
| S100P | 43.75029199 | 1.234494649 | 0.477575126 | 2.584922416 | 0.009740091 | 0.066173532 |
| LDB2 | 23.04633157 | -1.153187972 | 0.423313306 | -2.724194952 | 0.006445845 | 0.051586572 |
| RASL11B | 7.619708879 | 1.096385544 | 0.392093683 | 2.796233637 | 0.005170201 | 0.044781972 |
| CRACD | 36.22277267 | 1.130197418 | 0.335656399 | 3.367126091 | 0.00075956 | 0.013173117 |
| JCHAIN | 2067.359714 | 1.112350938 | 0.493833094 | 2.252483588 | 0.024291729 | 0.119435744 |
| PF4V1 | 305.093392 | 1.21963504 | 0.57687034 | 2.114227331 | 0.034495856 | 0.147461684 |
| CXCL1 | 71.62088383 | 1.666998607 | 0.567575933 | 2.937049494 | 0.003313512 | 0.033857339 |
| PF4 | 1574.960661 | 1.112150584 | 0.432324891 | 2.572487976 | 0.010097046 | 0.067782788 |
| PPBP | 8292.76506 | 1.034733951 | 0.43278069 | 2.390896764 | 0.016807278 | 0.094163941 |
| CXCL5 | 319.0845563 | 1.285509652 | 0.322029447 | 3.991900945 | 6.55E-05 | 0.002469549 |
| CXCL3 | 96.62437022 | 2.082505346 | 0.426423612 | 4.883653924 | 1.04E-06 | 0.00012668 |
| CXCL2 | 323.9793738 | 1.243480998 | 0.486765154 | 2.554580969 | 0.01063157 | 0.070179208 |
| CXCL9 | 16.66295616 | -1.30207131 | 0.46764989 | -2.784286574 | 0.005364561 | 0.045629491 |
| CXCL10 | 73.36661819 | -1.386662173 | 0.652087196 | -2.126498083 | 0.033461809 | 0.145189042 |
| SHROOM3 | 2.211356846 | -2.28057889 | 0.907921605 | -2.51186763 | 0.012009413 | NA |
| MAPK10 | 15.58887197 | 1.119818216 | 0.55145695 | 2.030653916 | 0.042290114 | 0.167879383 |
| MMRN1 | 621.3871904 | 1.336258804 | 0.542151837 | 2.46473167 | 0.013711589 | 0.08289813 |
| EGF | 370.0544917 | 1.107351336 | 0.418583501 | 2.645472967 | 0.008157681 | 0.059336613 |
| PRDM5 | 28.75802196 | 1.009661309 | 0.46359413 | 2.177899254 | 0.029413538 | 0.133672926 |
| GUCY1B1 | 475.1295108 | 1.080272575 | 0.399243747 | 2.705797108 | 0.006814066 | 0.053270521 |
| VEGFC | 14.68267486 | 1.055551493 | 0.356812554 | 2.958280137 | 0.003093608 | 0.032432324 |
| TENM3 | 1.483894248 | -2.766373823 | 0.995261335 | -2.779545156 | 0.005443508 | NA |
| C4orf47 | 6.121667074 | -1.563309454 | 0.583897385 | -2.677370191 | 0.00742026 | 0.055993202 |
| CDH6 | 5.604992521 | 1.726670171 | 0.605782086 | 2.850315666 | 0.004367586 | 0.04055057 |
| FST | 1.839479856 | -2.724984129 | 1.018003769 | -2.676791787 | 0.007433081 | NA |
| GPX8 | 1.700853322 | -2.55351573 | 0.932203407 | -2.739225916 | 0.006158404 | NA |
| IL31RA | 89.41236281 | -1.044076741 | 0.433751413 | -2.40708551 | 0.016080404 | 0.091348866 |
| RAB3C | 12.04380258 | 1.031322247 | 0.433967313 | 2.376497529 | 0.017477878 | 0.096189681 |
| AK6 | 2.593039098 | -2.914874005 | 1.159731166 | -2.513404909 | 0.011957201 | NA |
| GTF2H2C | 17.78330803 | -1.141203616 | 0.545353083 | -2.092595881 | 0.036385245 | 0.152534815 |
| ARHGEF28 | 70.51467412 | 1.038446461 | 0.334645461 | 3.103124296 | 0.001914892 | 0.023870177 |
| CKMT2 | 34.30195453 | 1.127919067 | 0.332644434 | 3.390764892 | 0.000696979 | 0.012407991 |
| PPIP5K2 | 30.35188532 | 1.130673275 | 0.476546176 | 2.372641587 | 0.017661393 | 0.09674686 |
| TMED7-TICAM2 | 3.409480712 | -1.452628534 | 0.650178638 | -2.234199111 | 0.025469975 | 0.122916148 |
| CDO1 | 5.932553193 | 1.772652595 | 0.762689795 | 2.324211764 | 0.020114147 | 0.105946521 |
| PRR16 | 7.083243374 | 1.114179168 | 0.500924139 | 2.224247308 | 0.02613181 | 0.124956275 |
| PCDHGB3 | 21.03364185 | 1.172480156 | 0.430678412 | 2.722402895 | 0.006480908 | 0.051670319 |
| HTR4 | 2.702792843 | 1.50044629 | 0.645190052 | 2.325588073 | 0.020040536 | NA |
| SH3TC2 | 164.4726712 | 1.112797105 | 0.306776528 | 3.627386721 | 0.000286304 | 0.006965587 |
| ABLIM3 | 361.7793441 | 1.17397269 | 0.383725034 | 3.059411262 | 0.002217725 | 0.026091247 |
| SLC6A7 | 2.620070905 | -1.493738777 | 0.755054837 | -1.978318266 | 0.047892814 | NA |
| SGCD | 110.7444873 | 1.021589645 | 0.486449401 | 2.100094362 | 0.035720541 | 0.150823626 |
| BTNL8 | 10.78085986 | 1.540404439 | 0.778822145 | 1.9778642 | 0.047944029 | 0.180932696 |
| FAM50B | 27.15534917 | 1.025520839 | 0.324056152 | 3.164639318 | 0.001552753 | 0.021059621 |
| CAGE1 | 5.316514362 | -1.360317112 | 0.690429027 | -1.970249017 | 0.048809838 | 0.182817981 |
| ELOVL2 | 3.61857381 | 1.633953445 | 0.630874921 | 2.589980028 | 0.00959815 | 0.06572072 |
| ABT1 | 7.073690959 | -1.82233735 | 0.637584783 | -2.858188271 | 0.004260675 | 0.040001588 |
| TCF19 | 13.14505688 | 1.629227591 | 0.823686235 | 1.977971127 | 0.047931964 | 0.180932696 |
| ATF6B | 7.041755541 | 3.480950239 | 1.128340752 | 3.085016855 | 0.002035406 | 0.02477153 |
| HLA-DRB5 | 628.8578717 | -4.968557968 | 1.293693187 | -3.840599935 | 0.000122734 | 0.003876223 |
| TAP2 | 6.285925305 | 3.022740164 | 1.086390485 | 2.782369881 | 0.00539635 | 0.045817024 |
| TREML1 | 855.7936848 | 1.147412974 | 0.434557746 | 2.64041542 | 0.008280446 | 0.059951448 |
| CAPN11 | 6.061475662 | 1.18545431 | 0.594263925 | 1.994827989 | 0.046061644 | 0.17638422 |
| RCAN2 | 25.0310322 | 1.625662235 | 0.382576369 | 4.249248949 | 2.14E-05 | 0.001092652 |
| SLC25A27 | 7.759785018 | -1.039299669 | 0.399401465 | -2.602142857 | 0.009264325 | 0.064122983 |
| MYO6 | 256.5473174 | 1.225533867 | 0.282748608 | 4.334358625 | 1.46E-05 | 0.000828237 |
| IMPG1 | 1.443068717 | 2.272217235 | 1.008409855 | 2.253267582 | 0.024242282 | NA |
| SH3BGRL2 | 2150.949846 | 1.313163837 | 0.396691316 | 3.310291363 | 0.000931989 | 0.015012896 |
| NKAIN2 | 5.834125266 | 1.583758015 | 0.707050235 | 2.239951188 | 0.025094092 | 0.121662609 |
| TPD52L1 | 4.289978883 | 1.526522107 | 0.727032415 | 2.099661688 | 0.035758612 | 0.150939209 |
| KIAA0408 | 2.956251511 | 1.353751074 | 0.685214575 | 1.97566007 | 0.04819329 | 0.181493333 |
| TMEM244 | 6.459184013 | 1.550713723 | 0.515470224 | 3.008347815 | 0.002626723 | 0.029139695 |
| ENPP3 | 165.9521233 | 1.140410242 | 0.382340569 | 2.982707918 | 0.002857105 | 0.030729124 |
| CTAGE9 | 12.23289934 | 1.32554935 | 0.545629509 | 2.429394541 | 0.015124064 | 0.087970185 |
| SLC35D3 | 9.199434189 | 1.656346713 | 0.478503275 | 3.461515937 | 0.000537142 | 0.010397277 |
| SASH1 | 195.3919461 | -1.113003537 | 0.297224745 | -3.744653013 | 0.000180643 | 0.00514961 |
| SLC22A3 | 5.937399985 | 1.192727367 | 0.432719676 | 2.756351125 | 0.005845021 | 0.048602886 |
| TCP10L2 | 1.858717596 | 2.026855541 | 0.948063558 | 2.137889937 | 0.032525677 | NA |
| RSPH10B2 | 1.549335813 | 2.379231529 | 1.053640788 | 2.258104997 | 0.023939114 | NA |
| ARL4A | 577.6049037 | -1.261248927 | 0.192099253 | -6.565610771 | 5.18E-11 | 3.66E-08 |
| GPNMB | 22.53499423 | -1.021329521 | 0.453233093 | -2.253431044 | 0.024231984 | 0.119266664 |
| HOXA5 | 9.26275736 | -1.399213298 | 0.438002031 | -3.194536097 | 0.001400558 | 0.019635298 |
| HOXA10 | 6.371268444 | 1.000197015 | 0.498972499 | 2.004513309 | 0.045015103 | 0.173934314 |
| AMPH | 42.11929761 | 1.073134124 | 0.283167572 | 3.789749353 | 0.000150799 | 0.00452751 |
| CAMK2B | 4.559427464 | -2.150894739 | 1.067963757 | -2.014014731 | 0.044007987 | 0.172212064 |
| EIF4H | 191.281087 | -1.237853774 | 0.578150621 | -2.141057588 | 0.032269394 | 0.141854649 |
| RHBDD2 | 17.42762307 | -1.383654832 | 0.589434736 | -2.347426691 | 0.018903593 | 0.101463901 |
| CFAP69 | 5.280008036 | -1.54974072 | 0.517499494 | -2.994670987 | 0.00274741 | 0.029868032 |
| GNG11 | 403.0747091 | 1.157446081 | 0.401516736 | 2.882684524 | 0.003943021 | 0.037844109 |
| DYNC1I1 | 12.45441609 | 1.445474901 | 0.467947597 | 3.088967465 | 0.002008534 | 0.024568802 |
| BHLHA15 | 7.761051132 | 1.354427403 | 0.506196141 | 2.675696816 | 0.007457407 | 0.056123453 |
| LRRC17 | 7.130054807 | 1.046828959 | 0.452347416 | 2.314214522 | 0.020655958 | 0.107635237 |
| PRKAR2B | 3113.285265 | 1.12744295 | 0.381394844 | 2.956104329 | 0.003115517 | 0.032541124 |
| CAV2 | 26.64847002 | 1.260471463 | 0.416484035 | 3.026458056 | 0.002474371 | 0.028067408 |
| CTTNBP2 | 9.063981957 | -1.503785527 | 0.581038139 | -2.588101239 | 0.009650661 | 0.065883155 |
| CALD1 | 259.2161608 | 1.018471847 | 0.447394169 | 2.276453108 | 0.022818904 | 0.114589878 |
| TAS2R40 | 1.822883292 | 1.662187032 | 0.823296264 | 2.018941547 | 0.043493295 | NA |
| CLCN1 | 2.655997381 | -1.972852966 | 0.923254744 | -2.13684574 | 0.03261054 | NA |
| LPL | 17.30059418 | -1.121240729 | 0.498993053 | -2.24700669 | 0.0246396 | 0.120307747 |
| GFRA2 | 23.13698422 | -1.024826129 | 0.359383862 | -2.851619778 | 0.00434971 | 0.040460614 |
| EGR3 | 134.9830879 | 1.496210345 | 0.329236293 | 4.544487893 | 5.51E-06 | 0.000422325 |
| CLU | 2121.034264 | 1.002800696 | 0.354134997 | 2.831690469 | 0.004630265 | 0.041990788 |
| ZNF703 | 234.8316478 | -1.158876684 | 0.234939869 | -4.932652306 | 8.11E-07 | 0.000107808 |
| LETM2 | 123.8596974 | -1.362499962 | 0.263228969 | -5.176101887 | 2.27E-07 | 3.85E-05 |
| TRPA1 | 33.28933632 | 1.240431584 | 0.354061302 | 3.503437331 | 0.000459295 | 0.009378374 |
| CRISPLD1 | 1.730680339 | 2.174420934 | 0.854633143 | 2.544274056 | 0.010950513 | NA |
| SDC2 | 20.43496625 | 1.038397499 | 0.507901051 | 2.044487792 | 0.040905382 | 0.164261767 |
| OSR2 | 6.405725551 | -2.27135804 | 0.723821177 | -3.138009927 | 0.001700991 | 0.022142699 |
| GRHL2 | 12.36267029 | 1.125387508 | 0.420194947 | 2.678250931 | 0.007400775 | 0.05587605 |
| CTHRC1 | 6.660946992 | 1.201452903 | 0.444977753 | 2.700029148 | 0.00693334 | 0.053621118 |
| ZFPM2 | 3.133381528 | 1.803607986 | 0.804928281 | 2.240706444 | 0.025045096 | 0.121614369 |
| PKHD1L1 | 537.8100894 | 1.174761377 | 0.433747936 | 2.708396466 | 0.00676092 | 0.053031321 |
| HAS2 | 0.984159448 | -2.072698778 | 1.054673844 | -1.965250954 | 0.049385199 | NA |
| KCNQ3 | 5.777284242 | 1.298578043 | 0.489196178 | 2.654513875 | 0.007942277 | 0.05846295 |
| NFIB | 36.43089211 | 1.331283089 | 0.589142151 | 2.259697572 | 0.023840027 | 0.117954636 |
| ADAMTSL1 | 1.088960787 | 2.663069241 | 1.121113292 | 2.375379241 | 0.017530928 | NA |
| AQP7 | 3.920104737 | 1.071557248 | 0.535766305 | 2.000045985 | 0.045495299 | 0.174954899 |
| CCIN | 34.23462052 | -1.048494616 | 0.287798476 | -3.643155546 | 0.000269316 | 0.006667224 |
| CNTNAP3 | 28.39586027 | 3.090787927 | 1.028310781 | 3.005694371 | 0.002649752 | 0.029325999 |
| ANXA1 | 8348.234553 | -1.067151605 | 0.174925609 | -6.100602491 | 1.06E-09 | 4.81E-07 |
| RORB | 21.05309888 | 1.207347972 | 0.344650255 | 3.503110629 | 0.000459858 | 0.009378374 |
| SLC28A3 | 17.89935136 | -1.035807504 | 0.500875976 | -2.067991987 | 0.038640777 | 0.15845975 |
| CDC14B | 546.9167046 | 1.06280647 | 0.246673125 | 4.308562068 | 1.64E-05 | 0.000895255 |
| PGAP4 | 1.975007695 | -2.49038202 | 0.857529172 | -2.904136793 | 0.003682672 | NA |
| KLF4 | 1559.55364 | -1.745560408 | 0.239582007 | -7.285857698 | 3.20E-13 | 9.02E-10 |
| SLC31A2 | 201.4770955 | -1.100650937 | 0.252980318 | -4.350737428 | 1.36E-05 | 0.000791152 |
| PTGES | 15.15116085 | -1.416476558 | 0.46326938 | -3.057565682 | 0.002231427 | 0.026195671 |
| SURF1 | 46.06267522 | -1.665028463 | 0.545587984 | -3.051805598 | 0.002274694 | 0.026549382 |
| KLF6 | 17975.62365 | -1.244732318 | 0.195811275 | -6.356795936 | 2.06E-10 | 1.21E-07 |
| CCDC3 | 12.0078001 | 1.300735411 | 0.572401787 | 2.272416754 | 0.023061351 | 0.115437645 |
| KIAA1217 | 6.349458566 | 1.540045916 | 0.578439106 | 2.662416668 | 0.007758178 | 0.057649102 |
| PRKG1 | 65.85309254 | 1.549243263 | 0.351603405 | 4.406223715 | 1.05E-05 | 0.000651014 |
| RHOBTB1 | 324.0299701 | 1.144884438 | 0.301337934 | 3.799337251 | 0.000145084 | 0.004412228 |
| STOX1 | 11.78700676 | 1.891785388 | 0.602376797 | 3.140534959 | 0.001686396 | 0.022059051 |
| COL13A1 | 34.03261647 | -1.153433852 | 0.349721905 | -3.298145854 | 0.000973256 | 0.015465778 |
| AC022400.5 | 2.296662401 | -1.436857389 | 0.714475487 | -2.011066039 | 0.044318482 | NA |
| NUTM2E | 8.941876915 | 1.073521833 | 0.44486771 | 2.413125988 | 0.015816351 | 0.090614914 |
| FFAR4 | 1.951451505 | -1.884820443 | 0.894479455 | -2.107170191 | 0.03510283 | NA |
| RRP12 | 1441.88878 | -1.046030225 | 0.193351982 | -5.409979321 | 6.30E-08 | 1.41E-05 |
| CFAP43 | 18.86152779 | -1.147014339 | 0.32484343 | -3.530975952 | 0.000414029 | 0.008785671 |
| RBM20 | 27.10124246 | -1.303430616 | 0.388394628 | -3.355943988 | 0.000790946 | 0.013604291 |
| ADRA2A | 30.8444283 | 1.465712938 | 0.517015608 | 2.834949112 | 0.004583299 | 0.041747123 |
| FGFR2 | 36.84981184 | 1.400437523 | 0.343397831 | 4.078178124 | 4.54E-05 | 0.001894965 |
| HTRA1 | 10.6781421 | -1.259325718 | 0.424618258 | -2.965783249 | 0.003019132 | 0.03188845 |
| TCERG1L | 12.146558 | 1.054489919 | 0.502789545 | 2.097278932 | 0.035968891 | 0.151600065 |
| IFITM10 | 38.39466793 | -1.244295502 | 0.288920524 | -4.30670513 | 1.66E-05 | 0.000899328 |
| CAVIN3 | 3.704312282 | -1.634578079 | 0.781299955 | -2.092126166 | 0.036427231 | 0.152574846 |
| C11orf16 | 2.370150608 | 2.131831781 | 0.756700272 | 2.817273706 | 0.004843323 | NA |
| MAPK8IP1 | 63.57576944 | -1.215559129 | 0.266538556 | -4.560537693 | 5.10E-06 | 0.000402225 |
| OR5B21 | 4.854865399 | 1.592975093 | 0.590732965 | 2.696607751 | 0.007004973 | 0.054014849 |
| GLYATL2 | 3.563574408 | 2.175189588 | 0.7638144 | 2.847798612 | 0.004402277 | 0.040734777 |
| SNX15 | 14.86566981 | 1.019536519 | 0.418373948 | 2.436902499 | 0.014813673 | 0.086808862 |
| SPDYC | 12.10470133 | 1.599868905 | 0.655673661 | 2.440038391 | 0.014685701 | 0.086114474 |
| MYEOV | 38.08061788 | 1.071596519 | 0.338569802 | 3.165068211 | 0.001550466 | 0.021059621 |
| P2RY2 | 131.8948975 | -1.074546467 | 0.2733099 | -3.931604618 | 8.44E-05 | 0.002937155 |
| P4HA3 | 6.118560576 | 1.16870744 | 0.451810445 | 2.586720721 | 0.009689409 | 0.066005341 |
| TENM4 | 7.828012944 | -2.327919323 | 0.951584753 | -2.446360471 | 0.014430664 | 0.085165663 |
| CCDC89 | 10.307919 | 1.071331089 | 0.408022496 | 2.625666723 | 0.008647945 | 0.061600044 |
| TRPC6 | 30.43275525 | 1.232741454 | 0.289830244 | 4.253322347 | 2.11E-05 | 0.001084704 |
| ANGPTL5 | 3.759193381 | -1.299674532 | 0.636943905 | -2.040485076 | 0.041302036 | 0.165102841 |
| SCN4B | 5.146756539 | -1.39202294 | 0.533598692 | -2.608745036 | 0.009087492 | 0.063442432 |
| ARCN1 | 60.02594386 | 1.389946067 | 0.385616268 | 3.604479845 | 0.000312779 | 0.00741785 |
| USP2 | 11.63413036 | -1.263802892 | 0.400676539 | -3.154172429 | 0.00160954 | 0.021463357 |
| TSPAN9 | 205.6266841 | 1.085586212 | 0.32748044 | 3.314965052 | 0.000916546 | 0.014818 |
| VWF | 205.6416599 | 1.278111069 | 0.471979768 | 2.707978509 | 0.006769441 | 0.053068653 |
| EMG1 | 11.2858344 | -1.365039988 | 0.529389398 | -2.578517806 | 0.009922519 | 0.067154273 |
| SLC2A14 | 15.90442138 | -2.329095087 | 1.048201554 | -2.221991637 | 0.026283871 | 0.125343596 |
| CD69 | 6878.728353 | -1.038164085 | 0.339876434 | -3.05453389 | 0.002254105 | 0.026352678 |
| OLR1 | 137.0222659 | 1.518111323 | 0.644321201 | 2.356140571 | 0.018465928 | 0.099683518 |
| GPRC5D | 23.27999603 | 1.329836816 | 0.586709216 | 2.26660291 | 0.023414494 | 0.116557565 |
| EMP1 | 136.7669681 | -1.535550074 | 0.475887028 | -3.226711349 | 0.001252217 | 0.018273047 |
| PDE3A | 177.7586821 | 1.188976229 | 0.376121957 | 3.16114549 | 0.0015715 | 0.021198663 |
| SPX | 130.4337568 | 1.224441258 | 0.461889623 | 2.650939094 | 0.008026831 | 0.058778733 |
| OVCH1 | 11.99014603 | 1.935769068 | 0.786398915 | 2.461561215 | 0.013833379 | 0.083270395 |
| DDX11 | 252.2700465 | 1.033547324 | 0.489223916 | 2.112626327 | 0.034632764 | 0.147706089 |
| CCDC184 | 17.89301651 | -1.367462724 | 0.442755962 | -3.088524697 | 0.00201153 | 0.024571879 |
| FAM186A | 7.024201371 | 1.149377066 | 0.454308587 | 2.529947921 | 0.011407946 | 0.073741867 |
| KRT8 | 8.430027612 | 1.340404552 | 0.553981354 | 2.419584239 | 0.015538261 | 0.089421046 |
| ATF7-NPFF | 3.091705072 | 1.355726293 | 0.684518234 | 1.980555413 | 0.047641153 | 0.18023172 |
| GLI1 | 188.8483504 | -1.036919989 | 0.270965182 | -3.826764688 | 0.000129839 | 0.004071448 |
| DDIT3 | 572.8507734 | -1.589793987 | 0.316361704 | -5.02524157 | 5.03E-07 | 7.02E-05 |
| IFNG | 255.7993454 | -1.597704046 | 0.341117373 | -4.683736951 | 2.82E-06 | 0.000268578 |
| TRHDE | 16.26976505 | 1.127023194 | 0.560111394 | 2.012141167 | 0.044205058 | 0.172593884 |
| SOCS2 | 332.3329709 | 1.090365023 | 0.321575306 | 3.390698855 | 0.000697147 | 0.012407991 |
| NTN4 | 79.57289082 | 1.560150868 | 0.388676622 | 4.014007482 | 5.97E-05 | 0.002301576 |
| CFAP54 | 12.41420636 | 1.032740194 | 0.335924703 | 3.074320479 | 0.002109827 | 0.025285259 |
| ANKS1B | 8.54728991 | 1.00606076 | 0.408875345 | 2.460556187 | 0.013872185 | 0.083395051 |
| NUAK1 | 84.2758815 | 1.072632214 | 0.394225301 | 2.720860915 | 0.006511215 | 0.051683362 |
| SDSL | 10.59834723 | -1.168799975 | 0.436986165 | -2.674684162 | 0.007479968 | 0.056203317 |
| TNFRSF19 | 5.430439385 | 1.168489776 | 0.538345006 | 2.170522182 | 0.02996731 | 0.134929391 |
| WASF3 | 127.6748971 | 1.061376432 | 0.37488642 | 2.831194664 | 0.004637449 | 0.042001951 |
| CCNA1 | 20.29749195 | 1.04292109 | 0.497830753 | 2.094931024 | 0.036177125 | 0.152159584 |
| RGCC | 1088.740777 | -1.588292406 | 0.228567117 | -6.948910359 | 3.68E-12 | 5.77E-09 |
| HTR2A | 5.844687168 | 1.288208374 | 0.493193979 | 2.61197101 | 0.009002189 | 0.063048842 |
| CMTM5 | 157.2512026 | 1.214909912 | 0.359076406 | 3.383430078 | 0.000715864 | 0.012683207 |
| LGALS3 | 642.5739269 | -1.012360784 | 0.201077593 | -5.034677247 | 4.79E-07 | 6.89E-05 |
| RGS6 | 121.5657905 | 1.080221296 | 0.309959523 | 3.485039871 | 0.000492064 | 0.009788956 |
| FOS | 12169.44824 | -1.59120487 | 0.485869655 | -3.274962438 | 0.00105676 | 0.016323337 |
| AL928654.3 | 0.999466109 | -2.08558549 | 1.002032878 | -2.081354351 | 0.037401484 | NA |
| OCA2 | 4.595531564 | -1.755504905 | 0.622905458 | -2.818252566 | 0.004828581 | 0.043096843 |
| NUTM1 | 1.70793945 | 2.521095926 | 0.960702735 | 2.62422062 | 0.008684751 | NA |
| MEIS2 | 2.598893747 | 1.474777525 | 0.67807146 | 2.174958852 | 0.0296332 | NA |
| PRTG | 1.734049587 | -2.595770597 | 0.99836163 | -2.600030408 | 0.00932155 | NA |
| GCOM1 | 23.68053387 | 1.640854541 | 0.815092108 | 2.013090946 | 0.044105063 | 0.172305243 |
| C2CD4A | 2.105582136 | 1.645633878 | 0.81648827 | 2.015502168 | 0.043852059 | NA |
| RBPMS2 | 107.296141 | 2.021478183 | 0.418840761 | 4.826364501 | 1.39E-06 | 0.000155723 |
| ODF3L1 | 2.371458578 | -1.935128884 | 0.864444555 | -2.238580683 | 0.025183212 | NA |
| KIF7 | 6.569150354 | -1.077759609 | 0.424453289 | -2.539171297 | 0.01111154 | 0.072523102 |
| ALDH1A3 | 2.454589324 | -1.814383961 | 0.727284399 | -2.494737911 | 0.012605019 | NA |
| PCSK6 | 259.5155814 | 1.222090606 | 0.436474332 | 2.799914028 | 0.005111622 | 0.04463496 |
| PDIA2 | 5.387425605 | 1.108938363 | 0.561463538 | 1.975085271 | 0.048258472 | 0.181593413 |
| MSLNL | 1.441547515 | 1.852887011 | 0.903461504 | 2.050875442 | 0.040279078 | NA |
| NPW | 3.923945039 | -1.530758819 | 0.598032867 | -2.559656673 | 0.010477562 | 0.069448808 |
| KREMEN2 | 1.653655661 | 2.507056209 | 1.118182489 | 2.242081444 | 0.024956109 | NA |
| SEC14L5 | 187.4448289 | 1.265235181 | 0.485234495 | 2.607471633 | 0.009121363 | 0.063514952 |
| TNFRSF17 | 57.30821706 | 1.143884268 | 0.393573527 | 2.906405512 | 0.003656073 | 0.036128043 |
| AC138969.1 | 10.62229498 | -1.849958833 | 0.721062959 | -2.565599592 | 0.010299765 | 0.068621332 |
| SLC5A11 | 10.57987337 | 1.978691714 | 0.47591208 | 4.157683319 | 3.21E-05 | 0.001463408 |
| CES1 | 11.00678505 | -1.945520391 | 0.783862593 | -2.481966109 | 0.01306597 | 0.080407285 |
| CFAP20 | 408.9056424 | -1.602437429 | 0.171502907 | -9.343500124 | 9.32E-21 | 1.32E-16 |
| CA7 | 1.502326724 | 1.924270008 | 0.971644079 | 1.980426834 | 0.047655587 | NA |
| EXOC3L1 | 7.665152294 | -1.52860176 | 0.41926277 | -3.645927732 | 0.000266429 | 0.006634594 |
| ZDHHC1 | 25.66769255 | -1.877182583 | 0.277424862 | -6.766454061 | 1.32E-11 | 1.41E-08 |
| ALOX15B | 13.62067729 | -1.079785578 | 0.443126956 | -2.436740901 | 0.014820294 | 0.086811611 |
| USP43 | 13.49794915 | -1.113979858 | 0.391697518 | -2.843979877 | 0.004455386 | 0.041064634 |
| LGALS9C | 27.72913807 | -1.394367004 | 0.452809005 | -3.079371187 | 0.002074381 | 0.025066586 |
| SLC47A2 | 7.486700719 | 1.070871136 | 0.41154175 | 2.602095983 | 0.009265592 | 0.064122983 |
| RHBDL3 | 4.042536714 | -1.853513347 | 0.816749492 | -2.269378023 | 0.023245347 | 0.115865478 |
| PTGES3L | 14.40851022 | 1.286426603 | 0.43843812 | 2.934112123 | 0.003345033 | 0.033933693 |
| CFAP97D1 | 2.05394888 | 1.898917753 | 0.903457374 | 2.101834361 | 0.035567788 | NA |
| ITGA2B | 2384.023127 | 1.264802902 | 0.456620742 | 2.769919949 | 0.005607007 | 0.047179772 |
| ITGB3 | 2369.165072 | 1.278843416 | 0.460537217 | 2.776851399 | 0.005488827 | 0.046434553 |
| SAMD14 | 89.18798622 | 1.001142364 | 0.279516721 | 3.581690424 | 0.000341378 | 0.007843277 |
| LPO | 3.999359398 | -1.417093251 | 0.576315542 | -2.458884324 | 0.013936952 | 0.08344922 |
| PPM1E | 2.622270772 | 1.675972874 | 0.676899439 | 2.475955477 | 0.013288015 | NA |
| FOXJ1 | 4.862818821 | -1.531605496 | 0.632119496 | -2.422968294 | 0.01539427 | 0.088882384 |
| C1QTNF1 | 1.486462056 | 2.291288457 | 1.033405743 | 2.217220556 | 0.026608024 | NA |
| CCDC40 | 12.14201443 | -1.113432361 | 0.490615746 | -2.269459083 | 0.023240423 | 0.115865478 |
| PPP1R27 | 9.16047038 | -1.293034087 | 0.394172517 | -3.280376054 | 0.001036688 | 0.016146474 |
| DLGAP1 | 14.00941497 | 1.674962378 | 0.428173862 | 3.911874418 | 9.16E-05 | 0.003121549 |
| CTAGE1 | 2.620949227 | -1.484312181 | 0.735614617 | -2.017785056 | 0.043613652 | NA |
| ANKRD29 | 4.436771279 | -1.293602068 | 0.510143146 | -2.53576291 | 0.011220267 | 0.07302625 |
| DSG3 | 3.312833623 | 2.712157558 | 0.781266688 | 3.471487523 | 0.000517583 | 0.010101825 |
| ASXL3 | 4.836080812 | 1.330567509 | 0.5396149 | 2.465772366 | 0.013671819 | 0.082868164 |
| PMAIP1 | 866.210318 | -1.67021752 | 0.212773803 | -7.849732881 | 4.17E-15 | 2.94E-11 |
| SERPINB2 | 78.73342227 | 1.173262739 | 0.411350583 | 2.852220923 | 0.004341492 | 0.04041081 |
| SMIM24 | 8.259585946 | -1.185925853 | 0.428607948 | -2.76692455 | 0.005658785 | 0.047473909 |
| TEX45 | 5.716368144 | -1.421779882 | 0.53452481 | -2.659895023 | 0.007816501 | 0.05794249 |
| COL5A3 | 125.5862299 | 1.305521532 | 0.48674012 | 2.682173664 | 0.007314548 | 0.05540289 |
| AP1M2 | 19.49516602 | 1.156670269 | 0.470164791 | 2.460137999 | 0.01388836 | 0.083420957 |
| CYP4F12 | 8.32256172 | 1.259643068 | 0.570284044 | 2.208799425 | 0.027188595 | 0.127545966 |
| F2RL3 | 20.90169186 | 1.004635943 | 0.298819302 | 3.362018242 | 0.00077375 | 0.013347662 |
| AC007192.1 | 10.87089805 | -1.213663528 | 0.525728994 | -2.308534516 | 0.020969425 | 0.108706672 |
| JUND | 4336.044805 | -1.099947676 | 0.20052859 | -5.485241174 | 4.13E-08 | 1.04E-05 |
| ZNF208 | 109.8040064 | 1.110214444 | 0.316843669 | 3.503981781 | 0.000458357 | 0.009378374 |
| FFAR1 | 5.869345973 | -1.608170947 | 0.679849529 | -2.365480711 | 0.018006681 | 0.098117961 |
| CYP2F1 | 17.06763037 | -1.595980945 | 0.327339919 | -4.875607439 | 1.08E-06 | 0.000129928 |
| TEX101 | 3.084036841 | 1.640132259 | 0.658223182 | 2.491757059 | 0.012711295 | 0.079191647 |
| FOSB | 5609.145938 | -2.569777885 | 0.480420355 | -5.349019583 | 8.84E-08 | 1.89E-05 |
| SIX5 | 3.006549973 | 1.434615947 | 0.648704373 | 2.211509599 | 0.027000568 | 0.1271288 |
| GNG8 | 6.267720031 | 1.055880816 | 0.476742604 | 2.214781742 | 0.026775049 | 0.126658638 |
| MYADM | 2754.903055 | -1.219249925 | 0.180403606 | -6.758456493 | 1.39E-11 | 1.41E-08 |
| PRKCG | 7.323335884 | -1.272091478 | 0.627789206 | -2.02630352 | 0.042733691 | 0.169196159 |
| LILRA2 | 2.940460692 | -2.522862144 | 0.948953627 | -2.658572634 | 0.007847243 | 0.058035876 |
| TNNT1 | 13.56122188 | -1.819595417 | 0.650199299 | -2.798519501 | 0.005133747 | 0.044705792 |
| SYT5 | 7.481104435 | -2.477388835 | 0.575389682 | -4.305584395 | 1.67E-05 | 0.000900396 |
| TMEM190 | 2.006231784 | 2.111492633 | 0.89620271 | 2.356043572 | 0.018470751 | NA |
| ZNF667 | 53.33135672 | -1.284140464 | 0.347677881 | -3.693477601 | 0.000221208 | 0.005856409 |
| TMC2 | 2.756583797 | -1.631436621 | 0.788212353 | -2.069793267 | 0.038471708 | NA |
| BMP2 | 5.357585254 | -1.384150813 | 0.530961345 | -2.606876801 | 0.009137223 | 0.063514952 |
| NINL | 82.42913675 | 1.222498915 | 0.573953883 | 2.129960177 | 0.033174901 | 0.144752947 |
| ID1 | 91.5025493 | -1.049886674 | 0.417914186 | -2.512206357 | 0.011997891 | 0.076208438 |
| CCM2L | 3.944437276 | -1.456562173 | 0.672353326 | -2.166364196 | 0.030283368 | 0.135825425 |
| MYL9 | 135.0749135 | 1.478092218 | 0.466316903 | 3.16971615 | 0.001525879 | 0.020783476 |
| VSTM2L | 2.728433534 | 1.498835237 | 0.713226437 | 2.101485811 | 0.035598342 | NA |
| GDAP1L1 | 12.79720975 | 1.114006564 | 0.355243559 | 3.135895177 | 0.001713304 | 0.022241432 |
| KCNS1 | 30.09586661 | 1.375226686 | 0.392763706 | 3.501409793 | 0.000462804 | 0.009383077 |
| EYA2 | 7.413102525 | 1.206473551 | 0.570789547 | 2.113692443 | 0.034541544 | 0.147522921 |
| MRAP | 3.222001657 | 1.293664616 | 0.575322886 | 2.248588832 | 0.024538668 | 0.120123125 |
| KCNJ15 | 170.7546496 | 1.670798549 | 0.640344996 | 2.609216217 | 0.009074988 | 0.063426032 |
| TUBA8 | 16.30699975 | 1.012314203 | 0.285656241 | 3.543819663 | 0.000394375 | 0.008574768 |
| SEPTIN5 | 342.3602044 | 1.094385676 | 0.326742817 | 3.349379445 | 0.000809928 | 0.013769751 |
| RTN4R | 6.108043742 | 1.086827625 | 0.419659352 | 2.589785309 | 0.00960358 | 0.06572072 |
| IGLL5 | 28.77234685 | 1.020847721 | 0.408596292 | 2.498426295 | 0.012474608 | 0.078304802 |
| GNAZ | 549.620448 | 1.032601129 | 0.401534345 | 2.571638374 | 0.010121856 | 0.067839273 |
| APOL4 | 16.78393663 | -1.471704103 | 0.559153623 | -2.632021047 | 0.00848786 | 0.060859857 |
| PVALB | 35.60181552 | 1.247528522 | 0.489153561 | 2.550382175 | 0.010760489 | 0.070887609 |
| CDC42EP1 | 55.98964951 | -1.251288663 | 0.315760668 | -3.962775579 | 7.41E-05 | 0.002687381 |
| NDUFA6 | 15.37621826 | -2.973986993 | 0.758942748 | -3.918592018 | 8.91E-05 | 0.00306545 |
| RABL2B | 22.58602314 | -1.378133541 | 0.694935824 | -1.983109077 | 0.047355247 | 0.179631691 |
| CD99 | 6.760842477 | 1.69966183 | 0.816541796 | 2.081536839 | 0.037384796 | 0.155203546 |
| FAM9B | 3.658721191 | -1.434905719 | 0.621284982 | -2.309577344 | 0.020911565 | 0.108563643 |
| BEND2 | 457.1697492 | 1.061200988 | 0.399891784 | 2.653720411 | 0.007960976 | 0.058479324 |
| PPEF1 | 5.53176568 | -1.447666991 | 0.44544658 | -3.249922786 | 0.001154363 | 0.017421629 |
| CXorf58 | 11.99603801 | 1.117336342 | 0.511554637 | 2.184197466 | 0.028947741 | 0.132237479 |
| PCYT1B | 173.9211551 | 1.075694302 | 0.290058933 | 3.708537052 | 0.00020846 | 0.005629798 |
| MAOB | 17.47400145 | 2.04317749 | 0.631678853 | 3.234519376 | 0.001218477 | 0.01793759 |
| ATP7A | 4.87125004 | 2.44152314 | 0.807036787 | 3.025293493 | 0.00248392 | 0.02813049 |
| SYTL4 | 132.9118791 | 1.138641547 | 0.34255907 | 3.323927603 | 0.000887592 | 0.014563739 |
| HNRNPH2 | 16.73968004 | -1.655694046 | 0.539202057 | -3.070637478 | 0.002136023 | 0.025419256 |
| ARMCX3 | 10.77685658 | -1.193183719 | 0.548302225 | -2.176142398 | 0.029544614 | 0.133966599 |
| ZNF185 | 161.1678579 | 1.678429695 | 0.464669933 | 3.612090163 | 0.000303739 | 0.007264508 |
| PLXNB3 | 4.194447056 | 3.641464438 | 1.102900988 | 3.30171473 | 0.000960957 | 0.015304821 |
| TKTL1 | 5.991564942 | -1.387771902 | 0.641832935 | -2.162201139 | 0.030602676 | 0.13691641 |
