# Supplementary material for: Identification of Diagnostic Biomarkers of Rape Pollen Allergy Based on MRNA Sequencing
Source: Hindawi journal article supplement (doi:10.1155/2022/6153577), 2022-09-28
Supplement: f1 [file 6153577.f1.zip › 6153577.f1/Table S2.docx]

| Table S2: Enriched GO items and KEGG pathways of DEGs by ClusterProfiler | | | | | | | | | |
| --- | --- | --- | --- | --- | --- | --- | --- | --- | --- |
| **GO** |  |  |  |  |  |  |  |  |  |
| ONTOLOGY | ID | Description | GeneRatio | BgRatio | pvalue | p.adjust | qvalue | geneID | Count |
| BP | GO:0070098 | chemokine-mediated signaling pathway | 13/343 | 88/18866 | 6.65643959123006E-09 | 0.000025201280292397 | 0.0000227019623953531 | MPL/CXCR2/CXCR1/CCR5/PF4V1/CXCL1/PF4/PPBP/CXCL5/CXCL3/CXCL2/CXCL9/CXCL10 | 13 |
| BP | GO:1990868 | response to chemokine | 13/343 | 97/18866 | 2.230878328592E-08 | 0.000028153684506831 | 0.0000253615641566248 | MPL/CXCR2/CXCR1/CCR5/PF4V1/CXCL1/PF4/PPBP/CXCL5/CXCL3/CXCL2/CXCL9/CXCL10 | 13 |
| BP | GO:1990869 | cellular response to chemokine | 13/343 | 97/18866 | 2.230878328592E-08 | 0.000028153684506831 | 0.0000253615641566248 | MPL/CXCR2/CXCR1/CCR5/PF4V1/CXCL1/PF4/PPBP/CXCL5/CXCL3/CXCL2/CXCL9/CXCL10 | 13 |
| BP | GO:0030168 | platelet activation | 16/343 | 158/18866 | 3.19707212628123E-08 | 0.0000302602876752519 | 0.0000272592465503979 | MPL/PEAR1/SELP/PF4V1/PF4/TREML1/PRKG1/ADRA2A/TRPC6/VWF/ITGA2B/ITGB3/C1QTNF1/F2RL3/PRKCG/MYL9 | 16 |
| BP | GO:0030593 | neutrophil chemotaxis | 13/343 | 103/18866 | 4.64521173859286E-08 | 0.0000304063314712283 | 0.0000273908065634553 | TGFB2/CXCR2/CXCR1/PF4V1/CXCL1/PF4/PPBP/CXCL5/CXCL3/CXCL2/CXCL9/CXCL10/LGALS3 | 13 |
| BP | GO:1990266 | neutrophil migration | 14/343 | 122/18866 | 4.8187530065338E-08 | 0.0000304063314712283 | 0.0000273908065634553 | TGFB2/CXCR2/CXCR1/PF4V1/CXCL1/PF4/PPBP/CXCL5/CXCL3/CXCL2/CXCL9/CXCL10/LGALS3/CD99 | 14 |
| BP | GO:0071621 | granulocyte chemotaxis | 14/343 | 127/18866 | 8.04225284090382E-08 | 0.0000434970989366598 | 0.0000391833070744788 | TGFB2/CXCR2/CXCR1/PF4V1/CXCL1/PF4/PPBP/CXCL5/CXCL3/CXCL2/CXCL9/CXCL10/ANXA1/LGALS3 | 14 |
| BP | GO:0097530 | granulocyte migration | 15/343 | 150/18866 | 1.02200938632371E-07 | 0.0000483665942077695 | 0.0000435698738380107 | TGFB2/CXCR2/CXCR1/PF4V1/CXCL1/PF4/PPBP/CXCL5/CXCL3/CXCL2/CXCL9/CXCL10/ANXA1/LGALS3/CD99 | 15 |
| BP | GO:0007596 | blood coagulation | 22/343 | 343/18866 | 3.54482887657969E-07 | 0.000149119134741452 | 0.000134330357428283 | MPL/F3/PEAR1/SELP/PROS1/PF4V1/PF4/MMRN1/TREML1/PRKAR2B/ZFPM2/PRKG1/ADRA2A/TRPC6/VWF/ITGA2B/ITGB3/C1QTNF1/SERPINB2/F2RL3/PRKCG/MYL9 | 22 |
| BP | GO:0007599 | hemostasis | 22/343 | 348/18866 | 4.53376014979887E-07 | 0.000163819357338006 | 0.000147572696576067 | MPL/F3/PEAR1/SELP/PROS1/PF4V1/PF4/MMRN1/TREML1/PRKAR2B/ZFPM2/PRKG1/ADRA2A/TRPC6/VWF/ITGA2B/ITGB3/C1QTNF1/SERPINB2/F2RL3/PRKCG/MYL9 | 22 |
| BP | GO:0050817 | coagulation | 22/343 | 349/18866 | 4.75967493586388E-07 | 0.000163819357338006 | 0.000147572696576067 | MPL/F3/PEAR1/SELP/PROS1/PF4V1/PF4/MMRN1/TREML1/PRKAR2B/ZFPM2/PRKG1/ADRA2A/TRPC6/VWF/ITGA2B/ITGB3/C1QTNF1/SERPINB2/F2RL3/PRKCG/MYL9 | 22 |
| BP | GO:0002576 | platelet degranulation | 13/343 | 129/18866 | 6.68591666354574E-07 | 0.000210940670734868 | 0.000190020789384984 | SELP/TGFB2/PROS1/PF4/PPBP/MMRN1/EGF/VEGFC/CLU/VWF/ITGA2B/ITGB3/SYTL4 | 13 |
| BP | GO:0050679 | positive regulation of epithelial cell proliferation | 16/343 | 211/18866 | 1.67846925321462E-06 | 0.000488821891743889 | 0.000440343350640921 | JUN/F3/VEGFC/CAV2/EGR3/ZNF703/OSR2/HAS2/STOX1/FGFR2/HTRA1/ITGB3/BMP2/ID1/ATP7A/PLXNB3 | 16 |
| BP | GO:0097529 | myeloid leukocyte migration | 16/343 | 222/18866 | 3.25517285464373E-06 | 0.000871273700236035 | 0.000784865790520408 | TGFB2/CXCR2/CXCR1/PF4V1/CXCL1/PF4/PPBP/CXCL5/CXCL3/CXCL2/CXCL9/CXCL10/VEGFC/ANXA1/LGALS3/CD99 | 16 |
| BP | GO:0034109 | homotypic cell-cell adhesion | 10/343 | 86/18866 | 3.60178659542663E-06 | 0.000871273700236035 | 0.000784865790520408 | MPL/PEAR1/ZNF703/PRKG1/ITGA2B/ITGB3/C1QTNF1/CCM2L/MYL9/CD99 | 10 |
| BP | GO:0050678 | regulation of epithelial cell proliferation | 22/343 | 395/18866 | 3.68208642466364E-06 | 0.000871273700236035 | 0.000784865790520408 | JUN/F3/TGFB2/DUSP10/VEGFC/HOXA5/CAV2/EGR3/ZNF703/OSR2/HAS2/NFIB/STOX1/FGFR2/HTRA1/GLI1/RGCC/ITGB3/BMP2/ID1/ATP7A/PLXNB3 | 22 |
| BP | GO:0030595 | leukocyte chemotaxis | 16/343 | 232/18866 | 5.73010182851196E-06 | 0.00127612738369096 | 0.0011495684163702 | TGFB2/CXCR2/CXCR1/CCR5/PF4V1/CXCL1/PF4/PPBP/CXCL5/CXCL3/CXCL2/CXCL9/CXCL10/VEGFC/ANXA1/LGALS3 | 16 |
| BP | GO:1903034 | regulation of response to wounding | 14/343 | 183/18866 | 6.76791102243642E-06 | 0.00142351728505246 | 0.00128234103583006 | AJAP1/F3/SELP/DUSP10/PROS1/ANXA1/KLF4/PRKG1/ADRA2A/C1QTNF1/SERPINB2/RTN4R/ATP7A/SYTL4 | 14 |
| BP | GO:0019730 | antimicrobial humoral response | 12/343 | 137/18866 | 7.82801574142816E-06 | 0.00155983513668669 | 0.00140513966771342 | JCHAIN/PF4V1/CXCL1/PF4/PPBP/CXCL5/CXCL3/CXCL2/CXCL9/CXCL10/CLU/ATP7A | 12 |
| BP | GO:0061844 | antimicrobial humoral immune response mediated by antimicrobial peptide | 9/343 | 75/18866 | 8.54380801428596E-06 | 0.00161734285710433 | 0.00145694410348876 | PF4V1/CXCL1/PF4/PPBP/CXCL5/CXCL3/CXCL2/CXCL9/CXCL10 | 9 |
| BP | GO:0002237 | response to molecule of bacterial origin | 20/343 | 356/18866 | 9.00638942896878E-06 | 0.00162372335133694 | 0.00146269181703553 | ALPL/FCGR2B/SELP/DUSP10/CCR5/PF4V1/CXCL1/PF4/PPBP/CXCL5/CXCL3/CXCL2/CXCL9/CXCL10/SASH1/PTGES/FGFR2/FOS/LILRA2/MAOB | 20 |
| BP | GO:0050673 | epithelial cell proliferation | 23/343 | 453/18866 | 0.0000101424076802277 | 0.001745416158061 | 0.00157231583176735 | JUN/F3/TGFB2/DUSP10/VEGFC/FST/HOXA5/CAV2/EGR3/ZNF703/OSR2/HAS2/NFIB/STOX1/FGFR2/HTRA1/GLI1/RGCC/ITGB3/BMP2/ID1/ATP7A/PLXNB3 | 23 |
| BP | GO:0022408 | negative regulation of cell-cell adhesion | 14/343 | 191/18866 | 0.0000110520891325433 | 0.00181926997633952 | 0.0016388452535213 | FCGR2B/GPNMB/ZNF703/ANXA1/KLF4/PRKG1/RGCC/LGALS3/LGALS9C/FOXJ1/C1QTNF1/MYADM/BMP2/CCM2L | 14 |
| BP | GO:0032496 | response to lipopolysaccharide | 19/343 | 334/18866 | 0.0000126704484923425 | 0.00199876324966703 | 0.00180053741733288 | ALPL/SELP/DUSP10/CCR5/PF4V1/CXCL1/PF4/PPBP/CXCL5/CXCL3/CXCL2/CXCL9/CXCL10/SASH1/PTGES/FGFR2/FOS/LILRA2/MAOB | 19 |
| BP | GO:0060326 | cell chemotaxis | 18/343 | 311/18866 | 0.0000170077997520325 | 0.0025756611944478 | 0.00232022194511938 | TGFB2/CXCR2/CXCR1/CCR5/PF4V1/CXCL1/PF4/PPBP/CXCL5/CXCL3/CXCL2/CXCL9/CXCL10/VEGFC/EGR3/ANXA1/LGALS3/PLXNB3 | 18 |
| BP | GO:0006959 | humoral immune response | 20/343 | 377/18866 | 0.0000206862406229505 | 0.00301223488455733 | 0.00271349876997407 | C1QC/FCGR2B/CR1L/PROS1/JCHAIN/PF4V1/CXCL1/PF4/PPBP/CXCL5/CXCL3/CXCL2/CXCL9/CXCL10/CLU/IFNG/RGCC/FOXJ1/IGLL5/ATP7A | 20 |
| BP | GO:0060541 | respiratory system development | 13/343 | 204/18866 | 0.0000966321867505977 | 0.0133102593406335 | 0.0119902244456453 | MME/HOXA5/GRHL2/ZFPM2/NFIB/FGFR2/GLI1/ALDH1A3/FOXJ1/CCDC40/GNG8/ID1/ATP7A | 13 |
| BP | GO:0019932 | second-messenger-mediated signaling | 21/343 | 456/18866 | 0.000100175417471822 | 0.0133102593406335 | 0.0119902244456453 | PTGER3/SELP/NR5A2/CXCR2/CXCR1/CCR5/DRD3/PF4/CXCL9/CXCL10/GUCY1B1/SGCD/RCAN2/BHLHA15/PRKAR2B/PRKG1/FFAR4/ADRA2A/PDE3A/SAMD14/MRAP | 21 |
| BP | GO:0061041 | regulation of wound healing | 11/343 | 151/18866 | 0.000101953914653558 | 0.0133102593406335 | 0.0119902244456453 | AJAP1/F3/SELP/DUSP10/PROS1/ANXA1/PRKG1/ADRA2A/C1QTNF1/SERPINB2/SYTL4 | 11 |
| BP | GO:0034111 | negative regulation of homotypic cell-cell adhesion | 4/343 | 15/18866 | 0.000125059670094539 | 0.0152321871952281 | 0.013721546560052 | ZNF703/PRKG1/C1QTNF1/CCM2L | 4 |
| BP | GO:0010959 | regulation of metal ion transport | 19/343 | 396/18866 | 0.000126319205980026 | 0.0152321871952281 | 0.013721546560052 | DRD3/CXCL9/CXCL10/EGF/NKAIN2/CAMK2B/SLC31A2/ADRA2A/TRPC6/SCN4B/IFNG/HTR2A/LGALS3/F2RL3/FFAR1/LILRA2/TMC2/KCNS1/ATP7A | 19 |
| BP | GO:0070527 | platelet aggregation | 7/343 | 62/18866 | 0.000128745375131352 | 0.0152321871952281 | 0.013721546560052 | MPL/PEAR1/PRKG1/ITGA2B/ITGB3/C1QTNF1/MYL9 | 7 |
| BP | GO:0007162 | negative regulation of cell adhesion | 16/343 | 301/18866 | 0.000135124217230103 | 0.0155024329222173 | 0.0139649908716279 | AJAP1/FCGR2B/GPNMB/ZNF703/ANXA1/KLF4/PRKG1/RGCC/LGALS3/LGALS9C/FOXJ1/C1QTNF1/MYADM/BMP2/CCM2L/PLXNB3 | 16 |
| BP | GO:0022407 | regulation of cell-cell adhesion | 20/343 | 439/18866 | 0.000168793671050494 | 0.0187196566052977 | 0.0168631488311965 | FCGR2B/SELP/DUSP10/TENM3/GPNMB/EGR3/ZNF703/HAS2/ANXA1/KLF4/PRKG1/IFNG/RGCC/LGALS3/LGALS9C/FOXJ1/C1QTNF1/MYADM/BMP2/CCM2L | 20 |
| BP | GO:0071216 | cellular response to biotic stimulus | 14/343 | 246/18866 | 0.000174395365031915 | 0.0187196566052977 | 0.0168631488311965 | FCGR2B/CCR5/PF4V1/CXCL1/PF4/PPBP/CXCL5/CXCL3/CXCL2/CXCL9/CXCL10/SASH1/DDIT3/LILRA2 | 14 |
| BP | GO:0098742 | cell-cell adhesion via plasma-membrane adhesion molecules | 15/343 | 277/18866 | 0.000177999904329297 | 0.0187196566052977 | 0.0168631488311965 | IGSF9/SELP/CRB1/TGFB2/CNTN4/TENM3/CDH6/PCDHGB3/KLF4/TENM4/DSG3/MYADM/BMP2/VSTM2L/PLXNB3 | 15 |
| BP | GO:0071219 | cellular response to molecule of bacterial origin | 13/343 | 222/18866 | 0.000223818156786183 | 0.0229020416646618 | 0.0206307490181289 | FCGR2B/CCR5/PF4V1/CXCL1/PF4/PPBP/CXCL5/CXCL3/CXCL2/CXCL9/CXCL10/SASH1/LILRA2 | 13 |
| BP | GO:0048730 | epidermis morphogenesis | 5/343 | 32/18866 | 0.000259466864818618 | 0.0258510934264023 | 0.0232873308036654 | TGFB2/FST/KLF4/FGFR2/ATP7A | 5 |
| BP | GO:1902893 | regulation of pri-miRNA transcription by RNA polymerase II | 6/343 | 51/18866 | 0.00031243262322221 | 0.0303299977312638 | 0.0273220431643714 | JUN/TGFB2/NFIB/KLF4/FOS/BMP2 | 6 |
| BP | GO:0061614 | pri-miRNA transcription by RNA polymerase II | 6/343 | 53/18866 | 0.000386330403796015 | 0.0365661727192929 | 0.0329397502183971 | JUN/TGFB2/NFIB/KLF4/FOS/BMP2 | 6 |
| BP | GO:0030324 | lung development | 11/343 | 177/18866 | 0.000407793161375083 | 0.0376546979251702 | 0.0339203217609341 | MME/HOXA5/GRHL2/ZFPM2/NFIB/FGFR2/GLI1/FOXJ1/CCDC40/ID1/ATP7A | 11 |
| BP | GO:0015850 | organic hydroxy compound transport | 14/343 | 268/18866 | 0.000417722480944836 | 0.0376546979251702 | 0.0339203217609341 | AQP10/DRD3/EGF/SLC22A3/CLU/AQP7/ADRA2A/HTR2A/SLC5A11/CES1/ITGB3/C1QTNF1/SYT5/MAOB | 14 |
| BP | GO:0071222 | cellular response to lipopolysaccharide | 12/343 | 208/18866 | 0.000443149968189242 | 0.0387625458378826 | 0.0349182996954819 | CCR5/PF4V1/CXCL1/PF4/PPBP/CXCL5/CXCL3/CXCL2/CXCL9/CXCL10/SASH1/LILRA2 | 12 |
| BP | GO:0008643 | carbohydrate transport | 10/343 | 151/18866 | 0.000450489175083686 | 0.0387625458378826 | 0.0349182996954819 | AQP10/SLC45A3/MFSD2B/PPBP/SLC25A27/SLC35D3/AQP7/FFAR4/SLC2A14/SLC5A11 | 10 |
| BP | GO:0030323 | respiratory tube development | 11/343 | 181/18866 | 0.000492578560983406 | 0.0414422762640706 | 0.0373322698850582 | MME/HOXA5/GRHL2/ZFPM2/NFIB/FGFR2/GLI1/FOXJ1/CCDC40/ID1/ATP7A | 11 |
| BP | GO:0060428 | lung epithelium development | 5/343 | 37/18866 | 0.00052140439602239 | 0.0423295586436244 | 0.0381315567062427 | HOXA5/GRHL2/NFIB/FGFR2/FOXJ1 | 5 |
| BP | GO:0030278 | regulation of ossification | 12/343 | 212/18866 | 0.000525485804609178 | 0.0423295586436244 | 0.0381315567062427 | TGFB2/VEGFC/OSR2/CTHRC1/RORB/FFAR4/FGFR2/GLI1/KREMEN2/JUND/BMP2/ID1 | 12 |
| BP | GO:0060487 | lung epithelial cell differentiation | 4/343 | 22/18866 | 0.000606079756207247 | 0.0478045407708466 | 0.0430635616252518 | HOXA5/GRHL2/NFIB/FOXJ1 | 4 |
| BP | GO:0007200 | phospholipase C-activating G protein-coupled receptor signaling pathway | 8/343 | 104/18866 | 0.000623174130711513 | 0.0481497399770161 | 0.0433745259614458 | PTGER3/CXCR2/DRD3/FFAR4/ADRA2A/P2RY2/HTR2A/F2RL3 | 8 |
| BP | GO:0021859 | pyramidal neuron differentiation | 3/343 | 10/18866 | 0.000650155840883584 | 0.049115887225883 | 0.0442448562882255 | SLC4A10/FGFR2/ATP7A | 3 |
| BP | GO:0045667 | regulation of osteoblast differentiation | 9/343 | 131/18866 | 0.000661624471347076 | 0.049115887225883 | 0.0442448562882255 | VEGFC/CTHRC1/RORB/FFAR4/FGFR2/GLI1/JUND/BMP2/ID1 | 9 |
| CC | GO:0031091 | platelet alpha granule | 14/355 | 91/19559 | 9.85958492951961E-10 | 3.65790600885178E-07 | 3.39377291784517E-07 | SELP/TGFB2/PROS1/PF4/PPBP/MMRN1/EGF/VEGFC/TREML1/CLU/VWF/ITGA2B/ITGB3/SYTL4 | 14 |
| CC | GO:0031093 | platelet alpha granule lumen | 9/355 | 67/19559 | 3.26857537052867E-06 | 0.000606320731233068 | 0.00056253902429625 | TGFB2/PROS1/PF4/PPBP/MMRN1/EGF/VEGFC/CLU/VWF | 9 |
| CC | GO:0062023 | collagen-containing extracellular matrix | 21/355 | 427/19559 | 0.0000387441101629745 | 0.00479135495682118 | 0.00444537685027813 | C1QC/F3/TGFB2/LTBP1/COL6A3/PF4/MMRN1/IMPG1/CLU/SDC2/CTHRC1/ANXA1/COL13A1/FGFR2/HTRA1/ANGPTL5/VWF/NTN4/LGALS3/PCSK6/COL5A3 | 21 |
| CC | GO:0031092 | platelet alpha granule membrane | 4/355 | 17/19559 | 0.000210618199827734 | 0.0195348380340223 | 0.0181242503535971 | SELP/ITGA2B/ITGB3/SYTL4 | 4 |
| CC | GO:0030667 | secretory granule membrane | 15/355 | 306/19559 | 0.000506539336964564 | 0.0375852188027707 | 0.0348712343552447 | FCGR3B/SELP/CXCR2/CXCR1/PLA1A/MME/CAV2/OLR1/LGALS3/ITGA2B/ITGB3/TEX101/SYT5/TMEM190/SYTL4 | 15 |
| MF | GO:0045236 | CXCR chemokine receptor binding | 9/345 | 18/18352 | 1.10726344264692E-11 | 6.62143538702861E-09 | 6.04915501825004E-09 | PF4V1/CXCL1/PF4/PPBP/CXCL5/CXCL3/CXCL2/CXCL9/CXCL10 | 9 |
| MF | GO:0008009 | chemokine activity | 9/345 | 49/18352 | 2.79907578028049E-07 | 0.0000836923658303867 | 0.0000764589647350303 | PF4V1/CXCL1/PF4/PPBP/CXCL5/CXCL3/CXCL2/CXCL9/CXCL10 | 9 |
| MF | GO:0019865 | immunoglobulin binding | 6/345 | 24/18352 | 4.27294305390116E-06 | 0.000851739982077631 | 0.000778125419289369 | FCGR2B/FCGR3B/JCHAIN/VWF/LGALS3/LILRA2 | 6 |
| MF | GO:0042379 | chemokine receptor binding | 9/345 | 70/18352 | 6.26406652760984E-06 | 0.000936477945877671 | 0.000855539612586712 | PF4V1/CXCL1/PF4/PPBP/CXCL5/CXCL3/CXCL2/CXCL9/CXCL10 | 9 |
| MF | GO:0008201 | heparin binding | 13/345 | 169/18352 | 0.0000192575279439188 | 0.00230320034209268 | 0.0021041383163987 | SELP/LIPH/PF4V1/PF4/CXCL10/IMPG1/GPNMB/LPL/COL13A1/FGFR2/PCSK6/COL5A3/RTN4R | 13 |
| MF | GO:0005539 | glycosaminoglycan binding | 15/345 | 232/18352 | 0.0000352089061400618 | 0.00332023775803918 | 0.00303327476927008 | BCAN/SELP/LIPH/JCHAIN/PF4V1/PF4/CXCL10/IMPG1/GPNMB/LPL/COL13A1/FGFR2/PCSK6/COL5A3/RTN4R | 15 |
| MF | GO:1901681 | sulfur compound binding | 16/345 | 262/18352 | 0.0000388656593750406 | 0.00332023775803918 | 0.00303327476927008 | SELP/LIPH/PF4V1/PF4/CXCL10/FST/IMPG1/GPNMB/LPL/PTGES/COL13A1/FGFR2/PCSK6/COL5A3/RTN4R/TKTL1 | 16 |
| MF | GO:0015144 | carbohydrate transmembrane transporter activity | 6/345 | 37/18352 | 0.0000600615635954138 | 0.00448960187875718 | 0.00410157256658155 | AQP10/SLC45A3/PPBP/AQP7/SLC2A14/SLC5A11 | 6 |
| MF | GO:0001664 | G protein-coupled receptor binding | 16/345 | 293/18352 | 0.000144815245934487 | 0.00962216856320259 | 0.00879053949005834 | MARCO/DRD3/PF4V1/CXCL1/PF4/PPBP/CXCL5/CXCL3/CXCL2/CXCL9/CXCL10/CTHRC1/ADRA2A/NPW/MRAP/GNAZ | 16 |
| MF | GO:0005126 | cytokine receptor binding | 15/345 | 271/18352 | 0.000200699784835752 | 0.012001847133178 | 0.0109645461399742 | TGFB2/RASL11B/PF4V1/CXCL1/PF4/PPBP/CXCL5/CXCL3/CXCL2/CXCL9/CXCL10/VEGFC/IFNG/SOCS2/ITGB3 | 15 |
| MF | GO:0098632 | cell-cell adhesion mediator activity | 6/345 | 51/18352 | 0.000373057562762335 | 0.020280765684716 | 0.0185279306290576 | IGSF9/CNTN4/ANXA1/VSTM2L/CDC42EP1/PLXNB3 | 6 |
| MF | GO:0004896 | cytokine receptor activity | 8/345 | 97/18352 | 0.000486155237595806 | 0.0242267360068577 | 0.0221328568694933 | MPL/F3/IL1R2/CXCR2/CXCR1/CCR5/IL31RA/GFRA2 | 8 |
| MF | GO:0005125 | cytokine activity | 13/345 | 235/18352 | 0.00052997025179013 | 0.024378631582346 | 0.022271624346484 | TGFB2/PF4V1/CXCL1/PF4/PPBP/CXCL5/CXCL3/CXCL2/CXCL9/CXCL10/IFNG/CMTM5/BMP2 | 13 |
| MF | GO:0098631 | cell adhesion mediator activity | 6/345 | 60/18352 | 0.000900259545341697 | 0.0363081053422667 | 0.0331700522313614 | IGSF9/CNTN4/ANXA1/VSTM2L/CDC42EP1/PLXNB3 | 6 |
| MF | GO:0015166 | polyol transmembrane transporter activity | 3/345 | 11/18352 | 0.000971454323538909 | 0.0363081053422667 | 0.0331700522313614 | AQP10/AQP7/SLC5A11 | 3 |
| MF | GO:0052739 | phosphatidylserine 1-acylhydrolase activity | 3/345 | 11/18352 | 0.000971454323538909 | 0.0363081053422667 | 0.0331700522313614 | PLA1A/PLAAT1/LPL | 3 |
| MF | GO:0140375 | immune receptor activity | 9/345 | 135/18352 | 0.00103688190383697 | 0.0364738457937945 | 0.0333214679932747 | MPL/F3/FCGR2B/IL1R2/CXCR2/CXCR1/CCR5/IL31RA/GFRA2 | 9 |
| MF | GO:0051119 | sugar transmembrane transporter activity | 4/345 | 25/18352 | 0.00113605926301572 | 0.0377424132935222 | 0.0344803951757403 | SLC45A3/PPBP/SLC2A14/SLC5A11 | 4 |
| MF | GO:0008970 | phospholipase A1 activity | 3/345 | 12/18352 | 0.00127729808753858 | 0.0402012766498985 | 0.0367267427940457 | PLA1A/PLAAT1/LPL | 3 |
|  |  |  |  |  |  |  |  |  |  |
| **KEGG** |  |  |  |  |  |  |  |  |  |
|  | ID | Description | GeneRatio | BgRatio | pvalue | p.adjust | qvalue | geneID | Count |
|  | hsa04061 | Viral protein interaction with cytokine and cytokine receptor | 12/169 | 100/8086 | 1.00236067606023E-06 | 0.000254599611719297 | 0.000211023300223206 | 3579/3577/1234/5197/2919/5196/5473/6374/2921/2920/4283/3627 | 12 |
|  | hsa04060 | Cytokine-cytokine receptor interaction | 20/169 | 295/8086 | 3.08160298151526E-06 | 0.000312864052990205 | 0.000259315418972404 | 4352/7042/7850/3579/3577/1234/5197/2919/5196/5473/6374/2921/2920/4283/3627/133396/3458/55504/608/650 | 20 |
|  | hsa04657 | IL-17 signaling pathway | 11/169 | 94/8086 | 3.69524472035676E-06 | 0.000312864052990205 | 0.000259315418972404 | 3725/2919/6374/2921/2920/3627/5602/3458/2353/3727/2354 | 11 |
|  | hsa04062 | Chemokine signaling pathway | 14/169 | 192/8086 | 0.0000458093078740314 | 0.00290889105000099 | 0.00241101620389639 | 3579/3577/1234/5197/2919/5196/5473/6374/2921/2920/4283/3627/2791/94235 | 14 |
|  | hsa04380 | Osteoclast differentiation | 11/169 | 128/8086 | 0.0000705352262570798 | 0.00358318949385965 | 0.00296990426345599 | 3725/2213/2215/7042/5602/3458/2353/3690/3727/2354/11027 | 11 |
|  | hsa04668 | TNF signaling pathway | 10/169 | 112/8086 | 0.000109916045845528 | 0.00465311260746069 | 0.00385670336300099 | 3725/2919/6374/2921/2920/3627/5602/7424/1388/2353 | 10 |
|  | hsa05323 | Rheumatoid arthritis | 9/169 | 93/8086 | 0.000131362186103344 | 0.00476657075289276 | 0.00395074243919831 | 3725/7042/2919/6374/2921/2920/3127/3458/2353 | 9 |
|  | hsa05231 | Choline metabolism in cancer | 9/169 | 98/8086 | 0.000196585848047798 | 0.00624160067551757 | 0.00517331179073152 | 3725/126969/5602/1950/6581/10810/2353/5582/9468 | 9 |
|  | hsa04610 | Complement and coagulation cascades | 8/169 | 85/8086 | 0.000377907884118639 | 0.010665400285126 | 0.00883995050569916 | 714/2152/1379/5627/1191/7450/5055/9002 | 8 |
|  | hsa05031 | Amphetamine addiction | 7/169 | 69/8086 | 0.000558137530530936 | 0.0140718667361063 | 0.0116633789772949 | 3725/1388/816/2353/2354/5582/4129 | 7 |
|  | hsa05120 | Epithelial cell signaling in Helicobacter pylori infection | 7/169 | 70/8086 | 0.000609411551563659 | 0.0140718667361063 | 0.0116633789772949 | 3725/3579/3577/2919/2921/2920/5602 | 7 |
|  | hsa04510 | Focal adhesion | 12/169 | 201/8086 | 0.000999654224627181 | 0.0211388433233098 | 0.017520798444517 | 3725/1293/3693/5602/1950/7424/858/7450/3674/3690/5582/10398 | 12 |
|  | hsa05140 | Leishmaniasis | 7/169 | 77/8086 | 0.00108190930394893 | 0.0211388433233098 | 0.017520798444517 | 3725/2215/1379/7042/3127/3458/2353 | 7 |
|  | hsa04145 | Phagosome | 10/169 | 152/8086 | 0.00127233904273212 | 0.0230838654895684 | 0.0191329179358213 | 2213/2215/8685/3693/3127/6891/1780/4973/3690/51807 | 10 |
|  | hsa04728 | Dopaminergic synapse | 9/169 | 132/8086 | 0.00173116973061555 | 0.02931447410509 | 0.0242971190261832 | 1814/5602/1388/816/2791/2353/94235/5582/4129 | 9 |
|  | hsa05418 | Fluid shear stress and atherosclerosis | 9/169 | 139/8086 | 0.00246964901098727 | 0.0392056780494228 | 0.0324953817235167 | 3725/7850/5602/858/6383/3458/2353/3674/3690 | 9 |
|  | hsa05410 | Hypertrophic cardiomyopathy | 7/169 | 90/8086 | 0.00268054754519119 | 0.0400505339105036 | 0.0331956352345658 | 4000/7042/53632/3693/6444/3674/3690 | 7 |
