# Supplementary material for: Identification of Diagnostic Biomarkers of Rape Pollen Allergy Based on MRNA Sequencing
Source: Hindawi journal article supplement (doi:10.1155/2022/6153577), 2022-09-28
Supplement: f1 [file 6153577.f1.zip › 6153577.f1/Table S3.docx]

| Table S3: Underlying KEGG pathways of DEGs by GSEA | | | | | | | | | |
| --- | --- | --- | --- | --- | --- | --- | --- | --- | --- |
| **Description** | **setSize** | **enrichmentScore** | **NES** | **pvalue** | **p.adjust** | **qvalues** | **rank** | **leading_edge** | **core_enrichment** |
| KEGG_RIBOSOME | 82 | -0.644115242154642 | -2.38826798679231 | 2.27963881986802E-10 | 4.12614626396112E-08 | 3.43145632885397E-08 | 4773 | tags=88%, list=32%, signal=60% | RPS15A/RPS28/RPS7/RPS5/RPL13/RPS3/RPL29/RPL10A/RPL3/RPLP0/RPL13A/RPS6/RPS20/RPS2/RPL37A/RPLP2/RPL6/RPL12/RPL32/UBA52/RPL7/RPL18/RPL27A/RPL35A/RPL38/RPL39/RPL24/RPL5/RPL28/RPL4/RPL41/RPL37/RPL26L1/RPL34/RPL21/RPS3A/RPL31/RPL27/RPL19/RPS21/RPL36/RPL15/RPL23A/RPL35/RPL22/RPS16/RPS19/RPL36AL/FAU/RPS12/RPS23/RPL18A/RPS8/RPL9/RPS27A/RPLP1/RPS13/RPL17/RPL23/RPS11/RPL8/RPS27/RPL26/RPL11/RPS24/RPL30/RPS10/RSL24D1/RPL22L1/RPL10/RPL36A/RPS4Y1 |
| KEGG_SPLICEOSOME | 118 | -0.543313546296924 | -2.15941459645833 | 8.37194073698465E-08 | 7.57660636697111E-06 | 6.30098697573056E-06 | 4660 | tags=70%, list=31%, signal=49% | SF3A2/ZMAT2/SF3A1/SNRNP27/PRPF6/PRPF40A/PRPF4/CDC40/ISY1/U2SURP/CCDC12/DHX15/PPIH/SNU13/SNRPD2/LSM7/SRSF2/LSM8/PRPF38B/SF3B2/SRSF9/LSM6/DHX8/TXNL4A/RBM17/SF3B6/CDC5L/PRPF38A/RBM25/SART1/HNRNPC/SF3B1/HNRNPA1L2/PCBP1/EFTUD2/CTNNBL1/SMNDC1/XAB2/PHF5A/LSM5/CRNKL1/THOC1/RBMX/SNRPA/PRPF18/HNRNPA3/HNRNPK/SNW1/PRPF31/SLU7/SRSF6/SNRPB/HNRNPM/RBM22/SNRPD1/DDX39B/SNRPB2/HNRNPU/SNRPF/SNRPG/EIF4A3/SF3B5/SNRPC/SRSF5/SNRPE/ALYREF/MAGOH/LSM3/WBP11/DDX5/CWC15/SYF2/SNRPA1/HNRNPA1/SRSF3/TRA2A/U2AF1/SRSF7/BCAS2/TRA2B/PUF60/BUD31/PRPF3 |
| KEGG_OXIDATIVE_PHOSPHORYLATION | 117 | -0.530321341098512 | -2.10396883207296 | 3.97904707475623E-07 | 0.0000240069173510292 | 0.0000199650432171979 | 4884 | tags=61%, list=33%, signal=41% | ATP6V1A/NDUFA4L2/ATP5MF/MT-CO2/TCIRG1/NDUFB2/NDUFC1/NDUFS7/COX6B1/CYC1/ATP5PD/UQCRC2/COX7A2L/ATP6V1H/NDUFA10/PPA1/COX7C/NDUFV1/ATP5F1A/NDUFA9/ATP6V1E2/COX5B/MT-CO3/NDUFA4/ATP5MC1/UQCRB/ATP6V0A1/ATP5MC3/COX7A1/ATP5PB/ATP5F1C/NDUFS4/MT-ATP6/UQCRC1/COX6A1/SDHB/UQCRQ/ATP6V1D/COX5A/NDUFA2/COX7A2/NDUFV3/NDUFA7/MT-ATP8/NDUFB4/NDUFB9/COX6C/ATP5PO/COX17/NDUFA5/ATP5ME/ATP5F1B/NDUFV2/ATP6V0D1/ATP5MC2/NDUFS3/NDUFA1/ATP6V1G1/UQCRFS1/ATP6V1B2/NDUFS6/COX4I1/ATP6V1F/COX8A/ATP6V0C/ATP6V0B/ATP5MG/ATP6AP1/COX7B/COX6B2/NDUFA6 |
| KEGG_HUNTINGTONS_DISEASE | 165 | -0.439847738656693 | -1.8239309827531 | 0.0000142979574985836 | 0.00064698257681091 | 0.000538054716394069 | 4652 | tags=51%, list=31%, signal=35% | RCOR1/NDUFB2/NDUFC1/NDUFS7/AP2A1/COX6B1/GRIN1/AP2M1/CYC1/ATP5PD/UQCRC2/POLR2C/COX7A2L/PPARG/NDUFA10/COX7C/TBP/NDUFV1/POLR2D/ATP5F1A/NDUFA9/CLTA/COX5B/CASP9/VDAC1/MT-CO3/NDUFA4/ATP5MC1/POLR2A/UQCRB/ATP5MC3/COX7A1/ATP5PB/ATP5F1C/CREB3L4/NDUFS4/MT-ATP6/DNALI1/UQCRC1/DCTN4/COX6A1/PLCB3/SDHB/AP2S1/UQCRQ/POLR2L/TFAM/COX5A/NDUFA2/COX7A2/NDUFV3/NDUFA7/MT-ATP8/DNAI1/NDUFB4/NDUFB9/COX6C/CASP8/ATP5PO/NDUFA5/ATP5F1B/DLG4/NDUFV2/ATP5MC2/NDUFS3/SLC25A5/NDUFA1/VDAC2/PLCB1/CLTB/UQCRFS1/NDUFS6/IFT57/COX4I1/POLR2K/BBC3/COX8A/CLTCL1/CYCS/COX7B/HIP1/PPARGC1A/COX6B2/NDUFA6 |
| KEGG_SYSTEMIC_LUPUS_ERYTHEMATOSUS | 69 | -0.537032009406694 | -1.93600769602076 | 0.0000747147599753969 | 0.00244341963266003 | 0.00203203842669604 | 1717 | tags=32%, list=11%, signal=28% | H3-4/CD86/MACROH2A1/HLA-DMA/SSB/C3/H2BC15/H4-16/HLA-DQB1/C1R/H2BC21/HLA-DQA1/FCGR1A/H2AC20/H3-3B/C1QB/H3-5/H2BC18/IFNG/C1QC/HLA-DRB1/HLA-DRB5 |
| KEGG_LYSOSOME | 112 | -0.465591744060205 | -1.83784345182338 | 0.000092564319612797 | 0.00244341963266003 | 0.00203203842669604 | 3937 | tags=49%, list=26%, signal=36% | CLTA/MANBA/ARSB/LIPA/CLN5/IDS/TPP1/AP3S1/ATP6V0A1/LAMP1/LAMP3/DNASE2/LGMN/LAPTM5/LAMP2/CTSC/NAGLU/CD164/CTSK/ACP5/MAN2B1/CD63/ATP6V0D1/MCOLN1/AP1S2/GAA/GUSB/SCARB2/HEXA/CTSB/SORT1/CTSH/CTSL/GNS/CLTB/HEXB/SGSH/CTSD/LAPTM4A/AP3B2/GM2A/NAGA/ATP6V0C/PSAP/CTSV/ASAH1/CTSZ/ATP6V0B/NPC2/PPT1/CLTCL1/ATP6AP1/CTSS/CD68/GBA |
| KEGG_CYTOKINE_CYTOKINE_RECEPTOR_INTERACTION | 198 | 0.440845863936551 | 1.70268966849064 | 0.00009449689187083 | 0.00244341963266003 | 0.00203203842669604 | 2230 | tags=38%, list=15%, signal=33% | CXCL3/CXCL1/TGFB2/CXCR1/CCL20/CXCR2/IL20/IL1R2/CXCL5/CXCL2/PF4V1/TNFRSF19/TNFRSF17/IL1A/PF4/EGF/IFNW1/CCR5/EDA2R/VEGFC/MPL/PPBP/IL17B/PDGFB/TNFRSF10C/CXCL8/PDGFA/BMPR1B/TNFSF4/IFNA21/TNFSF14/PDGFRB/IL1R1/FASLG/CCR3/IL5/CCR4/TPO/CXCL13/CXCL6/FLT4/AMH/CSF2/CCR2/IL10/CXCR6/INHBE/CX3CR1/IL7/IL17RB/CCR8/ACVR2A/IL5RA/CCR6/TNFRSF10D/CXCR3/LEPR/GHR/IFNLR1/PDGFRA/IL2RA/ACVR1/IL7R/IL19/FLT1/BMPR1A/CD27/KITLG/TNFRSF4/TNFRSF12A/TNFRSF8/IL23R/IFNA5/ACVR2B/NGFR |
| KEGG_DILATED_CARDIOMYOPATHY | 70 | 0.544850762686872 | 1.83432782255869 | 0.000246376591180006 | 0.00557427037544763 | 0.00463577007088695 | 3084 | tags=46%, list=21%, signal=36% | TGFB2/ITGA10/ITGB3/ITGA2B/ITGB5/ADCY6/SGCD/RYR2/IGF1/CACNG8/ADCY5/ITGB4/TPM1/CACNG1/TPM4/CACNG6/ITGB6/DMD/PRKACB/ITGB1/ITGA3/ACTG1/ADRB1/SGCB/CACNA2D2/ITGA1/CACNA1F/ITGB7/CACNB1/PRKX/CACNA1C/ADCY4 |
| KEGG_PARKINSONS_DISEASE | 117 | -0.43987346275307 | -1.74513070466185 | 0.00033182323678152 | 0.00667333398416169 | 0.00554979214734005 | 4616 | tags=53%, list=31%, signal=37% | NDUFB2/NDUFC1/NDUFS7/COX6B1/CYC1/ATP5PD/UQCRC2/PRKN/COX7A2L/NDUFA10/COX7C/NDUFV1/ATP5F1A/NDUFA9/COX5B/CASP9/VDAC1/MT-CO3/UBE2L6/NDUFA4/ATP5MC1/UQCRB/ATP5MC3/COX7A1/ATP5PB/ATP5F1C/UBB/NDUFS4/MT-ATP6/UQCRC1/COX6A1/SDHB/UQCRQ/COX5A/NDUFA2/COX7A2/NDUFV3/NDUFA7/MT-ATP8/NDUFB4/NDUFB9/COX6C/ATP5PO/NDUFA5/ATP5F1B/NDUFV2/ATP5MC2/NDUFS3/SLC25A5/NDUFA1/VDAC2/UQCRFS1/NDUFS6/COX4I1/COX8A/UBA1/CYCS/UCHL1/COX7B/COX6B2/SLC18A1/NDUFA6 |
| KEGG_OLFACTORY_TRANSDUCTION | 69 | 0.528448979145968 | 1.77436692411823 | 0.000739600446101097 | 0.0126079301306622 | 0.0104852224988932 | 1787 | tags=42%, list=12%, signal=37% | OR5B21/PRKG1/OR6K3/OR2L13/OR5K2/OR5C1/OR2T3/OR2T8/OR2T10/OR2L3/OR2T2/OR2A42/OR1K1/OR6N2/OR1L6/OR2AE1/OR1L4/OR2B11/OR2L2/OR10G2/OR4D1/OR6K6/OR2W3/OR2A1/OR13D1/OR2A4/OR2A7/PRKACB/OR2AK2 |
| KEGG_NEUROACTIVE_LIGAND_RECEPTOR_INTERACTION | 153 | 0.420853582617942 | 1.57159796378462 | 0.000766227797996043 | 0.0126079301306622 | 0.0104852224988932 | 2357 | tags=35%, list=16%, signal=30% | PTGER3/GABRB1/DRD3/HTR1B/HTR4/ADRA2A/HTR2A/CHRNA9/F2RL3/GHSR/LHB/FPR2/P2RX2/GABRR1/CHRNA10/PTH2R/PARD3/GLRA2/GIPR/CHRNA6/GPR83/MCHR1/GRIA4/TBXA2R/HTR6/GLRA1/P2RY1/OXTR/AVPR1A/HRH4/TSHR/P2RX6/CHRNA2/AVPR2/F2R/DRD4/EDNRB/S1PR1/LEPR/GHR/S1PR4/LPAR4/NTSR1/CHRNE/ADRB2/C3AR1/CNR1/GABRR2/GRM3/ADRB1/GABRB2/F2/THRB/GRM4 |
| KEGG_PROTEASOME | 40 | -0.581279748698618 | -1.89660502133246 | 0.00117745062106375 | 0.0170612517324408 | 0.0141887699781276 | 5061 | tags=78%, list=34%, signal=51% | PSMF1/PSMD4/PSME3/PSMD14/PSMD3/PSMA5/PSMC4/PSMC5/PSMD11/PSMD12/PSMA4/PSMA2/PSMA6/PSMB7/PSMD8/PSMD6/PSME2/PSMC2/PSMC1/PSME1/PSMA7/PSMB6/PSMB4/PSMC3/POMP/PSMA1/PSMD7/PSMB2/PSMC6/PSMB1/IFNG |
| KEGG_CHEMOKINE_SIGNALING_PATHWAY | 152 | 0.426889527826014 | 1.59121588518304 | 0.00128379005009616 | 0.0170612517324408 | 0.0141887699781276 | 1358 | tags=19%, list=9%, signal=18% | CXCL3/CXCL1/CXCR1/CCL20/CXCR2/CXCL5/CXCL2/PF4V1/GNG11/PF4/CCR5/GNG8/PPBP/ADCY6/BCAR1/CXCL8/PARD3/ADCY5/CCR3/CCR4/CXCL13/CXCL6/CCR2/CXCR6/CX3CR1/CCR8/CCR6/CXCR3/PIK3R3 |
| KEGG_LEISHMANIA_INFECTION | 63 | -0.495623126442627 | -1.75330120707688 | 0.00134679566236652 | 0.0170612517324408 | 0.0141887699781276 | 1504 | tags=25%, list=10%, signal=23% | HLA-DMA/C3/HLA-DQB1/NCF2/NFKBIA/NFKBIB/IFNGR2/HLA-DQA1/FCGR1A/NCF1/FOS/IFNG/HLA-DRB1/JUN/NOS2/HLA-DRB5 |
| KEGG_ALZHEIMERS_DISEASE | 149 | -0.376140970786135 | -1.53702822155071 | 0.0014139158894288 | 0.0170612517324408 | 0.0141887699781276 | 4616 | tags=46%, list=31%, signal=32% | NDUFB2/ADAM17/NDUFC1/NDUFS7/COX6B1/GRIN1/CYC1/ATP5PD/UQCRC2/COX7A2L/NDUFA10/COX7C/NDUFV1/ATP5F1A/NDUFA9/COX5B/GAPDH/CASP9/MT-CO3/NDUFA4/ATP5MC1/UQCRB/ATP5MC3/COX7A1/ATP5PB/ATP5F1C/NDUFS4/MT-ATP6/UQCRC1/COX6A1/PLCB3/SDHB/BID/UQCRQ/COX5A/NDUFA2/COX7A2/NDUFV3/CALM2/NDUFA7/MT-ATP8/NDUFB4/NDUFB9/COX6C/CASP8/ATP2A1/NCSTN/ATP5PO/NDUFA5/ATP5F1B/NDUFV2/PSENEN/ATP5MC2/NDUFS3/NDUFA1/LRP1/PLCB1/UQCRFS1/CHP1/NDUFS6/COX4I1/COX8A/CYCS/APOE/COX7B/LPL/COX6B2/PPP3R2/NDUFA6 |
| KEGG_OTHER_GLYCAN_DEGRADATION | 14 | -0.710703447492041 | -1.82063150842009 | 0.00389094781633847 | 0.0440163471723289 | 0.036605627482658 | 2241 | tags=43%, list=15%, signal=36% | MAN2B1/FUCA2/HEXA/HEXB/GBA/NEU4 |
| KEGG_FOCAL_ADHESION | 179 | 0.388750228616415 | 1.48282929116863 | 0.00418818967635113 | 0.044591901848209 | 0.0370842801063908 | 2010 | tags=26%, list=13%, signal=23% | CAV3/MYL9/ITGA10/COL5A3/ITGB3/VWF/ITGA2B/CAV2/ITGB5/MAPK10/EGF/COL6A3/VEGFC/PDGFB/BCAR1/IGF1/PDGFA/COL5A1/MYLK/PARVA/PDGFRB/VCL/ITGB4/FLT4/COL2A1/PAK3/THBS1/COL6A6/CHAD/PIK3R3/RASGRF1/PDGFRA/PTK2/CAV1/BCL2/ITGB6/FLT1/COL4A6/COL6A2/LAMC1/TLN1/FLNA/MYLK3/ITGB1/ITGA3/BIRC3 |
