# Supplementary material for: Identification of Diagnostic Biomarkers of Rape Pollen Allergy Based on MRNA Sequencing
Source: Hindawi journal article supplement (doi:10.1155/2022/6153577), 2022-09-28
Supplement: f1 [file 6153577.f1.zip › 6153577.f1/Table S4.docx]

| Table S4: Genes in MEred module | | | | | | | |
| --- | --- | --- | --- | --- | --- | --- | --- |
| **probes** | **moduleColor** | **MEred** | **MEred** | **GS.Control** | **p.GS.Control** | **GS.Case** | **p.GS.Case** |
| SLC25A33 | red | 0.8229812 | 9.02E-05 | 0.6969931 | 0.002694149 | -0.6969931 | 0.002694149 |
| EIF3I | red | 0.8160629 | 0.00011567 | 0.647551 | 0.006686562 | -0.647551 | 0.006686562 |
| PABPC4 | red | 0.8935265 | 3. 13E-06 | 0.7730668 | 0.000445082 | -0.7730668 | 0.000445082 |
| NFYC | red | -0.8501688 | 3.03E-05 | -0.8661118 | 1.44E-05 | 0.8661118 | 1.44E-05 |
| TOE1 | red | 0.8280954 | 7.45E-05 | 0.8565648 | 2.27E-05 | -0.8565648 | 2.27E-05 |
| JUN | red | 0.9119564 | 8.69E-07 | 0.7097538 | 0.002070609 | -0.7097538 | 0.002070609 |
| PGM1 | red | -0.8217928 | 9.42E-05 | -0.7261075 | 0.001448033 | 0.7261075 | 0.001448033 |
| GTF2B | red | 0.8799058 | 6.99E-06 | 0.8470405 | 3.47E-05 | -0.8470405 | 3.47E-05 |
| DNTTIP2 | red | 0.8463853 | 3.57E-05 | 0.8385059 | 4.96E-05 | -0.8385059 | 4.96E-05 |
| GCLM | red | -0.9030797 | 1.66E-06 | -0.8410974 | 4.46E-05 | 0.8410974 | 4.46E-05 |
| ABCD3 | red | -0.8301617 | 6.89E-05 | -0.6581127 | 0.005580267 | 0.6581127 | 0.005580267 |
| BCAS2 | red | 0.9002204 | 2.02E-06 | 0.7559443 | 0.000704764 | -0.7559443 | 0.000704764 |
| ENSA | red | 0.9101083 | 1.00E-06 | 0.771344 | 0.000466953 | -0.771344 | 0.000466953 |
| RFX5 | red | 0.8570154 | 2.23E-05 | 0.72815 | 0.001382397 | -0.72815 | 0.001382397 |
| LMNA | red | 0.8829789 | 5.88E-06 | 0.7171276 | 0.001767451 | -0.7171276 | 0.001767451 |
| IGSF9 | red | 0.8321552 | 6.38E-05 | 0.7187208 | 0.001706948 | -0.7187208 | 0.001706948 |
| PFDN2 | red | 0.8007551 | 0.000193799 | 0.8196023 | 0.000101977 | -0.8196023 | 0.000101977 |
| UFC1 | red | 0.8390236 | 4.85E-05 | 0.7680833 | 0.000510772 | -0.7680833 | 0.000510772 |
| MPC2 | red | 0.9110445 | 9.32E-07 | 0.8150643 | 0.000119798 | -0.8150643 | 0.000119798 |
| DCAF6 | red | -0.8270204 | 7.76E-05 | -0.8100144 | 0.000142603 | 0.8100144 | 0.000142603 |
| IER5 | red | 0.8935045 | 3. 13E-06 | 0.7897165 | 0.000273891 | -0.7897165 | 0.000273891 |
| PPP1R12B | red | -0.803444 | 0.000177571 | -0.7557172 | 0.000708899 | 0.7557172 | 0.000708899 |
| BTG2 | red | 0.8411565 | 4.45E-05 | 0.6294852 | 0.00897766 | -0.6294852 | 0.00897766 |
| PPP1R15B | red | 0.9022958 | 1.75E-06 | 0.7233311 | 0.0015413 | -0.7233311 | 0.0015413 |
| ATF3 | red | 0.8822133 | 6. 14E-06 | 0.7623504 | 0.000596012 | -0.7623504 | 0.000596012 |
| DUSP10 | red | 0.9508737 | 1.63E-08 | 0.8025385 | 0.000182905 | -0.8025385 | 0.000182905 |
| HNRNPU | red | 0.8479381 | 3.34E-05 | 0.8139047 | 0.000124746 | -0.8139047 | 0.000124746 |
| YPEL5 | red | 0.9403011 | 6. 18E-08 | 0.7892185 | 0.000278066 | -0.7892185 | 0.000278066 |
| AFTPH | red | -0.8200026 | 0.000100517 | -0.6482562 | 0.006607657 | 0.6482562 | 0.006607657 |
| SERTAD2 | red | 0.8108947 | 0.000138387 | 0.8727614 | 1.03E-05 | -0.8727614 | 1.03E-05 |
| RTKN | red | 0.8008746 | 0.000193053 | 0.5910052 | 0.01591367 | -0.5910052 | 0.01591367 |
| UGGT1 | red | -0.8743078 | 9.47E-06 | -0.8689684 | 1.25E-05 | 0.8689684 | 1.25E-05 |
| ZC3H15 | red | 0.8567766 | 2.25E-05 | 0.8958077 | 2.70E-06 | -0.8958077 | 2.70E-06 |
| CLK1 | red | 0.9546266 | 9.41E-09 | 0.8060215 | 0.000163091 | -0.8060215 | 0.000163091 |
| KANSL1L | red | -0.818738 | 0.000105189 | -0.6280535 | 0.009182831 | 0.6280535 | 0.009182831 |
| TRIP12 | red | -0.8432961 | 4.07E-05 | -0.749723 | 0.000825476 | 0.749723 | 0.000825476 |
| PER2 | red | 0.8528347 | 2.69E-05 | 0.7167448 | 0.001782241 | -0.7167448 | 0.001782241 |
| VGLL4 | red | -0.911331 | 9. 12E-07 | -0.8152398 | 0.000119064 | 0.8152398 | 0.000119064 |
| EAF1 | red | 0.9245041 | 3.06E-07 | 0.8440952 | 3.93E-05 | -0.8440952 | 3.93E-05 |
| CSRNP1 | red | 0.8664765 | 1.42E-05 | 0.621349 | 0.01019351 | -0.621349 | 0.01019351 |
| CTNNB1 | red | 0.9455561 | 3.29E-08 | 0.8633873 | 1.65E-05 | -0.8633873 | 1.65E-05 |
| KIF9 | red | 0.9442748 | 3.86E-08 | 0.8284255 | 7.36E-05 | -0.8284255 | 7.36E-05 |
| ARL6IP5 | red | -0.8030542 | 0.000179851 | -0.7200352 | 0.001658314 | 0.7200352 | 0.001658314 |
| ARMC8 | red | -0.8410209 | 4.47E-05 | -0.7100816 | 0.002056295 | 0.7100816 | 0.002056295 |
| EIF2A | red | 0.8946796 | 2.91E-06 | 0.9136813 | 7.60E-07 | -0.9136813 | 7.60E-07 |
| SLC33A1 | red | -0.8187685 | 0.000105074 | -0.6224942 | 0.01001494 | 0.6224942 | 0.01001494 |
| TIPARP | red | 0.853421 | 2.62E-05 | 0.690165 | 0.003085407 | -0.690165 | 0.003085407 |
| CCNL1 | red | 0.9403302 | 6. 16E-08 | 0.9244965 | 3.07E-07 | -0.9244965 | 3.07E-07 |
| MLF1 | red | 0.8829149 | 5.90E-06 | 0.7927982 | 0.000249188 | -0.7927982 | 0.000249188 |
| RARRES1 | red | -0.8470014 | 3.48E-05 | -0.6674395 | 0.004729651 | 0.6674395 | 0.004729651 |
| TRA2B | red | 0.8847365 | 5.32E-06 | 0.7995156 | 0.000201684 | -0.7995156 | 0.000201684 |
| DNAJB11 | red | 0.8928463 | 3.26E-06 | 0.7387098 | 0.00108056 | -0.7387098 | 0.00108056 |
| RASGEF1B | red | 0.8195847 | 0.000102041 | 0.6331995 | 0.008462223 | -0.6331995 | 0.008462223 |
| LIN54 | red | -0.8225037 | 9. 18E-05 | -0.6656183 | 0.004886996 | 0.6656183 | 0.004886996 |
| UBE2D3 | red | 0.9225436 | 3.65E-07 | 0.8241736 | 8.63E-05 | -0.8241736 | 8.63E-05 |
| BRIX1 | red | 0.8383867 | 4.98E-05 | 0.8522225 | 2.77E-05 | -0.8522225 | 2.77E-05 |
| HMGCS1 | red | 0.8045309 | 0.00017134 | 0.5475996 | 0.02811382 | -0.5475996 | 0.02811382 |
| GPX8 | red | 0.8424088 | 4.22E-05 | 0.7356006 | 0.001163198 | -0.7356006 | 0.001163198 |
| PPP2CA | red | 0.8409192 | 4.49E-05 | 0.8083843 | 0.000150692 | -0.8083843 | 0.000150692 |
| FAM13B | red | -0.8288616 | 7.24E-05 | -0.8224947 | 9. 18E-05 | 0.8224947 | 9. 18E-05 |
| FAM53C | red | 0.889572 | 3.99E-06 | 0.6752101 | 0.00410326 | -0.6752101 | 0.00410326 |
| ETF1 | red | 0.8789372 | 7.38E-06 | 0.7500676 | 0.000818375 | -0.7500676 | 0.000818375 |
| IK | red | 0.8555871 | 2.38E-05 | 0.8544056 | 2.51E-05 | -0.8544056 | 2.51E-05 |
| RBM22 | red | 0.8464566 | 3.56E-05 | 0.8352509 | 5.65E-05 | -0.8352509 | 5.65E-05 |
| DUSP1 | red | 0.8294563 | 7.08E-05 | 0.6932495 | 0.002903351 | -0.6932495 | 0.002903351 |
| BNIP1 | red | 0.8076118 | 0.000154656 | 0.7076698 | 0.002163533 | -0.7076698 | 0.002163533 |
| HNRNPH1 | red | 0.8203594 | 9.92E-05 | 0.7883712 | 0.000285293 | -0.7883712 | 0.000285293 |
| SQSTM1 | red | 0.92319 | 3.45E-07 | 0.7884663 | 0.000284474 | -0.7884663 | 0.000284474 |
| MRNIP | red | 0.9020341 | 1.79E-06 | 0.7630599 | 0.000584869 | -0.7630599 | 0.000584869 |
| MAPK14 | red | -0.8024571 | 0.000183391 | -0.8118278 | 0.000134031 | 0.8118278 | 0.000134031 |
| SRSF3 | red | 0.8787868 | 7.44E-06 | 0.750811 | 0.000803224 | -0.750811 | 0.000803224 |

| RNF8 | red | -0.9019569 | 1.80E-06 | -0.7640621 | 0.000569421 | 0.7640621 | 0.000569421 |
| --- | --- | --- | --- | --- | --- | --- | --- |
| UBR2 | red | -0.8824173 | 6.07E-06 | -0.8717248 | 1.08E-05 | 0.8717248 | 1.08E-05 |
| PTP4A1 | red | 0.8923727 | 3.36E-06 | 0.7687988 | 0.000500879 | -0.7687988 | 0.000500879 |
| SLC17A5 | red | -0.824611 | 8.49E-05 | -0.7468517 | 0.00088664 | 0.7468517 | 0.00088664 |
| FBXL4 | red | -0.8053648 | 0.000166684 | -0.711967 | 0.001975499 | 0.711967 | 0.001975499 |
| SMPD2 | red | 0.8168799 | 0.000112381 | 0.7420036 | 0.000998316 | -0.7420036 | 0.000998316 |
| TSPYL1 | red | 0.8301328 | 6.90E-05 | 0.7095103 | 0.002081296 | -0.7095103 | 0.002081296 |
| BCLAF1 | red | 0.9075003 | 1.21E-06 | 0.8969915 | 2.50E-06 | -0.8969915 | 2.50E-06 |
| ARL4A | red | 0.9436753 | 4. 15E-08 | 0.8297214 | 7.00E-05 | -0.8297214 | 7.00E-05 |
| TRA2A | red | 0.8757083 | 8.79E-06 | 0.7952765 | 0.000230687 | -0.7952765 | 0.000230687 |
| CYCS | red | 0.8505095 | 2.98E-05 | 0.710447 | 0.002040431 | -0.710447 | 0.002040431 |
| VPS41 | red | -0.9365139 | 9.41E-08 | -0.8019213 | 0.000186616 | 0.8019213 | 0.000186616 |
| SBDS | red | 0.9512824 | 1.53E-08 | 0.8684462 | 1.28E-05 | -0.8684462 | 1.28E-05 |
| BAIAP2L1 | red | 0.8768221 | 8.28E-06 | 0.7632392 | 0.000582081 | -0.7632392 | 0.000582081 |
| BUD31 | red | 0.902653 | 1.71E-06 | 0.775278 | 0.000418257 | -0.775278 | 0.000418257 |
| ING3 | red | 0.8089002 | 0.000148092 | 0.7597663 | 0.000638085 | -0.7597663 | 0.000638085 |
| MTMR7 | red | -0.815321 | 0.000118725 | -0.6724593 | 0.004316879 | 0.6724593 | 0.004316879 |
| XPO7 | red | -0.8283025 | 7.39E-05 | -0.7602961 | 0.000629267 | 0.7602961 | 0.000629267 |
| ZNF703 | red | 0.8066276 | 0.000159832 | 0.7730229 | 0.000445628 | -0.7730229 | 0.000445628 |
| LETM2 | red | 0.9362882 | 9.64E-08 | 0.7532589 | 0.000754954 | -0.7532589 | 0.000754954 |
| ZBTB10 | red | 0.8737429 | 9.76E-06 | 0.7433968 | 0.000965106 | -0.7433968 | 0.000965106 |
| ZNF706 | red | 0.8227448 | 9. 10E-05 | 0.8160804 | 0.000115598 | -0.8160804 | 0.000115598 |
| ENY2 | red | 0.8447224 | 3.83E-05 | 0.8927366 | 3.28E-06 | -0.8927366 | 3.28E-06 |
| RNF139 | red | 0.8994133 | 2. 13E-06 | 0.8869649 | 4.67E-06 | -0.8869649 | 4.67E-06 |
| CHRAC1 | red | 0.8316288 | 6.51E-05 | 0.8315925 | 6.52E-05 | -0.8315925 | 6.52E-05 |
| SNAPC3 | red | -0.8494163 | 3. 13E-05 | -0.7001721 | 0.002526224 | 0.7001721 | 0.002526224 |
| ZFAND5 | red | 0.8175708 | 0.00010966 | 0.7046471 | 0.002304295 | -0.7046471 | 0.002304295 |
| ANXA1 | red | 0.8845744 | 5.37E-06 | 0.8114424 | 0.000135816 | -0.8114424 | 0.000135816 |
| HNRNPK | red | 0.8419352 | 4.31E-05 | 0.8767233 | 8.32E-06 | -0.8767233 | 8.32E-06 |
| ZNF169 | red | -0.810848 | 0.000138608 | -0.5727138 | 0.02041039 | 0.5727138 | 0.02041039 |
| NUTM2G | red | -0.8386683 | 4.92E-05 | -0.7911959 | 0.000261791 | 0.7911959 | 0.000261791 |
| KLF4 | red | 0.8902138 | 3.84E-06 | 0.861373 | 1.81E-05 | -0.861373 | 1.81E-05 |
| RC3H2 | red | -0.8365621 | 5.36E-05 | -0.7450113 | 0.00092776 | 0.7450113 | 0.00092776 |
| RABGAP1 | red | -0.8315822 | 6.52E-05 | -0.6960431 | 0.002746048 | 0.6960431 | 0.002746048 |
| HSPA5 | red | 0.9307034 | 1.71E-07 | 0.7796709 | 0.000368909 | -0.7796709 | 0.000368909 |
| IDI1 | red | 0.8305304 | 6.79E-05 | 0.6434595 | 0.007159306 | -0.6434595 | 0.007159306 |
| KLF6 | red | 0.894096 | 3.02E-06 | 0.8048923 | 0.000169309 | -0.8048923 | 0.000169309 |
| DDX21 | red | 0.9089066 | 1.09E-06 | 0.8527338 | 2.70E-05 | -0.8527338 | 2.70E-05 |
| CDH23 | red | 0.8025273 | 0.000182972 | 0.6862695 | 0.003328375 | -0.6862695 | 0.003328375 |
| STAMBPL1 | red | -0.8289741 | 7.21E-05 | -0.7046242 | 0.002305385 | 0.7046242 | 0.002305385 |
| RRP12 | red | 0.8561475 | 2.32E-05 | 0.8168943 | 0.000112323 | -0.8168943 | 0.000112323 |
| PI4K2A | red | 0.8004531 | 0.000195696 | 0.7270009 | 0.001419019 | -0.7270009 | 0.001419019 |
| BTRC | red | -0.8841556 | 5.50E-06 | -0.8342867 | 5.87E-05 | 0.8342867 | 5.87E-05 |
| SFR1 | red | 0.9014033 | 1.87E-06 | 0.8071094 | 0.000157281 | -0.8071094 | 0.000157281 |
| CFAP43 | red | 0.8286158 | 7.31E-05 | 0.6932962 | 0.002900662 | -0.6932962 | 0.002900662 |
| DUSP8 | red | 0.8105014 | 0.000140258 | 0.6836181 | 0.003502391 | -0.6836181 | 0.003502391 |
| TMEM86A | red | 0.81206 | 0.000132966 | 0.7576506 | 0.000674323 | -0.7576506 | 0.000674323 |
| UBXN1 | red | 0.8290747 | 7. 18E-05 | 0.6650625 | 0.004935842 | -0.6650625 | 0.004935842 |
| NXF1 | red | 0.8345729 | 5.80E-05 | 0.7645464 | 0.000562077 | -0.7645464 | 0.000562077 |
| STX5 | red | 0.8580238 | 2. 12E-05 | 0.6712862 | 0.004410648 | -0.6712862 | 0.004410648 |
| WDR74 | red | 0.8274767 | 7.63E-05 | 0.7398325 | 0.001051926 | -0.7398325 | 0.001051926 |
| RBM14 | red | 0.8056432 | 0.000165153 | 0.7000217 | 0.002533974 | -0.7000217 | 0.002533974 |
| RBM4 | red | 0.8575402 | 2. 17E-05 | 0.7540068 | 0.000740689 | -0.7540068 | 0.000740689 |
| RBM7 | red | 0.8423075 | 4.24E-05 | 0.7959391 | 0.000225938 | -0.7959391 | 0.000225938 |
| ZPR1 | red | 0.8434896 | 4.04E-05 | 0.7886228 | 0.000283131 | -0.7886228 | 0.000283131 |
| CBL | red | -0.8758968 | 8.70E-06 | -0.7463622 | 0.000897429 | 0.7463622 | 0.000897429 |
| TIRAP | red | -0.802536 | 0.00018292 | -0.8383712 | 4.98E-05 | 0.8383712 | 4.98E-05 |
| WNK1 | red | -0.8301154 | 6.90E-05 | -0.8119318 | 0.000133553 | 0.8119318 | 0.000133553 |
| CD69 | red | 0.870688 | 1. 14E-05 | 0.5947177 | 0.01510371 | -0.5947177 | 0.01510371 |
| STYK1 | red | -0.8012371 | 0.000190803 | -0.679741 | 0.003769976 | 0.679741 | 0.003769976 |
| WBP11 | red | 0.8700153 | 1. 18E-05 | 0.8511468 | 2.90E-05 | -0.8511468 | 2.90E-05 |
| ETFRF1 | red | 0.8218855 | 9.39E-05 | 0.7715608 | 0.000464152 | -0.7715608 | 0.000464152 |
| TUBA1A | red | 0.8213086 | 9.59E-05 | 0.7625464 | 0.000592917 | -0.7625464 | 0.000592917 |
| PCBP2 | red | 0.81192 | 0.000133607 | 0.8668323 | 1.39E-05 | -0.8668323 | 1.39E-05 |
| HNRNPA1 | red | 0.8509789 | 2.92E-05 | 0.8984792 | 2.27E-06 | -0.8984792 | 2.27E-06 |
| DDIT3 | red | 0.9269175 | 2.46E-07 | 0.7665446 | 0.000532596 | -0.7665446 | 0.000532596 |
| IFNG | red | 0.8791185 | 7.30E-06 | 0.6690722 | 0.004592074 | -0.6690722 | 0.004592074 |
| CCDC59 | red | 0.8435842 | 4.02E-05 | 0.9169472 | 5.85E-07 | -0.9169472 | 5.85E-07 |
| SLC25A3 | red | 0.8181499 | 0.000107422 | 0.7753905 | 0.000416928 | -0.7753905 | 0.000416928 |
| RSRC2 | red | 0.9003572 | 2.00E-06 | 0.8711521 | 1. 12E-05 | -0.8711521 | 1. 12E-05 |
| UBC | red | 0.8291908 | 7. 15E-05 | 0.8876272 | 4.49E-06 | -0.8876272 | 4.49E-06 |
| RGCC | red | 0.9307095 | 1.71E-07 | 0.7847751 | 0.000317713 | -0.7847751 | 0.000317713 |

| DGKH | red | -0.8052262 | 0.00016745 | -0.8585414 | 2.07E-05 | 0.8585414 | 2.07E-05 |
| --- | --- | --- | --- | --- | --- | --- | --- |
| NGDN | red | 0.8144332 | 0.00012247 | 0.8354148 | 5.61E-05 | -0.8354148 | 5.61E-05 |
| RIPK3 | red | -0.8405274 | 4.56E-05 | -0.7400523 | 0.001046395 | 0.7400523 | 0.001046395 |
| SRSF5 | red | 0.8514177 | 2.87E-05 | 0.724628 | 0.001497144 | -0.724628 | 0.001497144 |
| SNW1 | red | 0.8077145 | 0.000154124 | 0.862658 | 1.71E-05 | -0.862658 | 1.71E-05 |
| DDX24 | red | 0.9382229 | 7.81E-08 | 0.868864 | 1.26E-05 | -0.868864 | 1.26E-05 |
| EIF5 | red | 0.9424477 | 4.81E-08 | 0.8639868 | 1.60E-05 | -0.8639868 | 1.60E-05 |
| UBR1 | red | -0.8166286 | 0.000113384 | -0.8434166 | 4.05E-05 | 0.8434166 | 4.05E-05 |
| RSL24D1 | red | 0.831817 | 6.46E-05 | 0.8926823 | 3.30E-06 | -0.8926823 | 3.30E-06 |
| MORF4L1 | red | 0.8918163 | 3.48E-06 | 0.8580127 | 2. 13E-05 | -0.8580127 | 2. 13E-05 |
| RBBP6 | red | 0.804979 | 0.000168824 | 0.8757074 | 8.79E-06 | -0.8757074 | 8.79E-06 |
| CFAP20 | red | 0.9426512 | 4.70E-08 | 0.8665616 | 1.41E-05 | -0.8665616 | 1.41E-05 |
| IRF8 | red | 0.8865916 | 4.77E-06 | 0.8297116 | 7.01E-05 | -0.8297116 | 7.01E-05 |
| ZNF469 | red | 0.8262699 | 7.98E-05 | 0.6904484 | 0.003068305 | -0.6904484 | 0.003068305 |
| PAFAH1B1 | red | -0.8995394 | 2. 12E-06 | -0.8417244 | 4.34E-05 | 0.8417244 | 4.34E-05 |
| TXNDC17 | red | 0.8353298 | 5.63E-05 | 0.7923063 | 0.000253002 | -0.7923063 | 0.000253002 |
| MED31 | red | 0.9141995 | 7.30E-07 | 0.8123614 | 0.000131593 | -0.8123614 | 0.000131593 |
| C17orf49 | red | 0.8309505 | 6.68E-05 | 0.6096303 | 0.01216891 | -0.6096303 | 0.01216891 |
| EIF5A | red | 0.9033874 | 1.63E-06 | 0.8280591 | 7.46E-05 | -0.8280591 | 7.46E-05 |
| PER1 | red | 0.8400443 | 4.65E-05 | 0.6820979 | 0.003605427 | -0.6820979 | 0.003605427 |
| MAP2K4 | red | -0.822468 | 9. 19E-05 | -0.7940511 | 0.000239687 | 0.7940511 | 0.000239687 |
| EIF1 | red | 0.938131 | 7.89E-08 | 0.9157728 | 6.44E-07 | -0.9157728 | 6.44E-07 |
| CLTC | red | -0.80749 | 0.000155289 | -0.7121472 | 0.001967915 | 0.7121472 | 0.001967915 |
| JMJD6 | red | 0.8409979 | 4.48E-05 | 0.5979754 | 0.01441981 | -0.5979754 | 0.01441981 |
| ALYREF | red | 0.8635999 | 1.63E-05 | 0.7545391 | 0.000730673 | -0.7545391 | 0.000730673 |
| CHMP1B | red | 0.9001893 | 2.03E-06 | 0.711027 | 0.002015451 | -0.711027 | 0.002015451 |
| PMAIP1 | red | 0.9562036 | 7.38E-09 | 0.8307237 | 6.74E-05 | -0.8307237 | 6.74E-05 |
| GTF2F1 | red | 0.8880562 | 4.37E-06 | 0.8062531 | 0.000161839 | -0.8062531 | 0.000161839 |
| TIMM44 | red | 0.8458317 | 3.66E-05 | 0.7532143 | 0.000755811 | -0.7532143 | 0.000755811 |
| JUNB | red | 0.823218 | 8.94E-05 | 0.6371258 | 0.007943145 | -0.6371258 | 0.007943145 |
| ADGRE5 | red | 0.814821 | 0.000120822 | 0.6466616 | 0.006787149 | -0.6466616 | 0.006787149 |
| DDX39A | red | 0.8827896 | 5.95E-06 | 0.6500822 | 0.006406773 | -0.6500822 | 0.006406773 |
| JUND | red | 0.909837 | 1.02E-06 | 0.7346357 | 0.001189867 | -0.7346357 | 0.001189867 |
| NFKBIB | red | 0.8297624 | 6.99E-05 | 0.6131942 | 0.01153885 | -0.6131942 | 0.01153885 |
| ZFP36 | red | 0.8043895 | 0.000172141 | 0.6499035 | 0.006426208 | -0.6499035 | 0.006426208 |
| CYP2F1 | red | 0.8175966 | 0.000109559 | 0.7837689 | 0.00032731 | -0.7837689 | 0.00032731 |
| ZNF180 | red | -0.8227556 | 9.09E-05 | -0.6436688 | 0.007134499 | 0.6436688 | 0.007134499 |
| FOSB | red | 0.8744663 | 9.39E-06 | 0.7168853 | 0.001776802 | -0.7168853 | 0.001776802 |
| PPP1R15A | red | 0.812973 | 0.000128843 | 0.701574 | 0.002454916 | -0.701574 | 0.002454916 |
| MYADM | red | 0.9122252 | 8.51E-07 | 0.8475897 | 3.39E-05 | -0.8475897 | 3.39E-05 |
| ZNF256 | red | 0.8144785 | 0.000122276 | 0.6820132 | 0.003611236 | -0.6820132 | 0.003611236 |
| NXT1 | red | 0.8087363 | 0.000148914 | 0.6296535 | 0.008953769 | -0.6296535 | 0.008953769 |
| TP53INP2 | red | 0.8083978 | 0.000150623 | 0.5322639 | 0.03380398 | -0.5322639 | 0.03380398 |
| RBM39 | red | 0.8976985 | 2.39E-06 | 0.7970394 | 0.000218232 | -0.7970394 | 0.000218232 |
| OSER1 | red | 0.9268531 | 2.47E-07 | 0.8496024 | 3. 11E-05 | -0.8496024 | 3. 11E-05 |
| SPATA2 | red | 0.858189 | 2. 11E-05 | 0.7942009 | 0.000238571 | -0.7942009 | 0.000238571 |
| BTG3 | red | 0.8581831 | 2. 11E-05 | 0.6812313 | 0.003665243 | -0.6812313 | 0.003665243 |
| SYNJ1 | red | -0.8765283 | 8.41E-06 | -0.7748422 | 0.000423435 | 0.7748422 | 0.000423435 |
| ZBTB21 | red | 0.8870457 | 4.64E-06 | 0.7684374 | 0.000505856 | -0.7684374 | 0.000505856 |
| MCAT | red | 0.8369292 | 5.28E-05 | 0.8465265 | 3.55E-05 | -0.8465265 | 3.55E-05 |
| PIGA | red | 0.9114281 | 9.05E-07 | 0.7826429 | 0.000338334 | -0.7826429 | 0.000338334 |
| MID1IP1 | red | 0.8105005 | 0.000140262 | 0.7281494 | 0.001382417 | -0.7281494 | 0.001382417 |
| NONO | red | 0.8548016 | 2.46E-05 | 0.8659603 | 1.45E-05 | -0.8659603 | 1.45E-05 |
| MORF4L2 | red | 0.9437467 | 4. 12E-08 | 0.8037697 | 0.000175684 | -0.8037697 | 0.000175684 |
| TSC22D3 | red | 0.8405998 | 4.55E-05 | 0.6886858 | 0.003175922 | -0.6886858 | 0.003175922 |
| LONRF3 | red | 0.8560898 | 2.32E-05 | 0.6680013 | 0.004681942 | -0.6680013 | 0.004681942 |
| RBMX | red | 0.8134552 | 0.000126708 | 0.818307 | 0.000106822 | -0.818307 | 0.000106822 |
