# Supplementary material for: Identification of Diagnostic Biomarkers of Rape Pollen Allergy Based on MRNA Sequencing
Source: Hindawi journal article supplement (doi:10.1155/2022/6153577), 2022-09-28
Supplement: f1 [file 6153577.f1.zip › 6153577.f1/Table S5.docx]

**Table S5: Rape pollen allergy-associated genes between DEGs and key module genes**

**Symbol**

JUN

LMNA

IGSF9

ATF3

DUSP10

KIF9

MLF1

GPX8

ARL4A

ZNF703

LETM2

ANXA1

KLF4

KLF6

RRP12

CFAP43

CD69

DDIT3

IFNG

RGCC

CFAP20

PMAIP1

JUND

CYP2F1

FOSB

MYADM
