# Supplementary material for: Identification of Diagnostic Biomarkers of Rape Pollen Allergy Based on MRNA Sequencing
Source: Hindawi journal article supplement (doi:10.1155/2022/6153577), 2022-09-28
Supplement: f1 [file 6153577.f1.zip › 6153577.f1/Table S6.docx]

| Table S6: Enriched GO items and KEGG pathways of rape pollen allergy-associated genes | | | | | | | | | |
| --- | --- | --- | --- | --- | --- | --- | --- | --- | --- |
| **GO** |  |  |  |  |  |  |  |  |  |
| ONTOLOGY | ID | Description | GeneRatio | BgRatio | pvalue | p.adjust | qvalue | geneID | Count |
| BP | GO:0022407 | regulation of cell-cell adhesion | 7/26 | 439/18866 | 1.57962370477048E-06 | 0.00179471662301397 | 0.00108990888037285 | DUSP10/ZNF703/ANXA1/KLF4/IFNG/RGCC/MYADM | 7 |
| BP | GO:0010632 | regulation of epithelial cell migration | 6/26 | 301/18866 | 2.76110249694457E-06 | 0.00179471662301397 | 0.00108990888037285 | JUN/DUSP10/ANXA1/KLF4/IFNG/RGCC | 6 |
| BP | GO:0022408 | negative regulation of cell-cell adhesion | 5/26 | 191/18866 | 0.0000055854792147663 | 0.00207917292595241 | 0.00126265562304802 | ZNF703/ANXA1/KLF4/RGCC/MYADM | 5 |
| BP | GO:0010631 | epithelial cell migration | 6/26 | 365/18866 | 8.35182142974431E-06 | 0.00207917292595241 | 0.00126265562304802 | JUN/DUSP10/ANXA1/KLF4/IFNG/RGCC | 6 |
| BP | GO:0090132 | epithelium migration | 6/26 | 368/18866 | 8.75108055557118E-06 | 0.00207917292595241 | 0.00126265562304802 | JUN/DUSP10/ANXA1/KLF4/IFNG/RGCC | 6 |
| BP | GO:0090130 | tissue migration | 6/26 | 374/18866 | 9.59618273516495E-06 | 0.00207917292595241 | 0.00126265562304802 | JUN/DUSP10/ANXA1/KLF4/IFNG/RGCC | 6 |
| BP | GO:0051101 | regulation of DNA binding | 4/26 | 124/18866 | 0.000023761128881136 | 0.00411954425918947 | 0.00250174752582356 | JUN/KLF4/DDIT3/IFNG | 4 |
| BP | GO:0001933 | negative regulation of protein phosphorylation | 6/26 | 444/18866 | 0.0000253510415950121 | 0.00411954425918947 | 0.00250174752582356 | JUN/ATF3/DUSP10/KLF4/IFNG/MYADM | 6 |
| BP | GO:0001667 | ameboidal-type cell migration | 6/26 | 481/18866 | 0.000039711530519141 | 0.00499581078806254 | 0.0030338931911311 | JUN/DUSP10/ANXA1/KLF4/IFNG/RGCC | 6 |
| BP | GO:0042326 | negative regulation of phosphorylation | 6/26 | 484/18866 | 0.000041115272697032 | 0.00499581078806254 | 0.0030338931911311 | JUN/ATF3/DUSP10/KLF4/IFNG/MYADM | 6 |
| BP | GO:0034976 | response to endoplasmic reticulum stress | 5/26 | 294/18866 | 0.0000446683402230869 | 0.00499581078806254 | 0.0030338931911311 | JUN/LMNA/ATF3/DDIT3/PMAIP1 | 5 |
| BP | GO:2000677 | regulation of transcription regulatory region DNA binding | 3/26 | 52/18866 | 0.000049100474929885 | 0.00499581078806254 | 0.0030338931911311 | KLF4/DDIT3/IFNG | 3 |
| BP | GO:0007162 | negative regulation of cell adhesion | 5/26 | 301/18866 | 0.0000499581078806254 | 0.00499581078806254 | 0.0030338931911311 | ZNF703/ANXA1/KLF4/RGCC/MYADM | 5 |
| BP | GO:1902107 | positive regulation of leukocyte differentiation | 4/26 | 159/18866 | 0.0000628456321910346 | 0.00583566584631035 | 0.00354392662731398 | JUN/DUSP10/ANXA1/IFNG | 4 |
| BP | GO:0001836 | release of cytochrome c from mitochondria | 3/26 | 60/18866 | 0.0000754740950091717 | 0.00654108823412822 | 0.00397232078995641 | JUN/LMNA/PMAIP1 | 3 |
| BP | GO:1902237 | positive regulation of endoplasmic reticulum stress-induced intrinsic apoptotic signaling pathway | 2/26 | 10/18866 | 0.0000816284968892377 | 0.00663231537225057 | 0.00402772188598212 | DDIT3/PMAIP1 | 2 |
| BP | GO:0034115 | negative regulation of heterotypic cell-cell adhesion | 2/26 | 11/18866 | 0.0000996835868734023 | 0.00675541641802007 | 0.00410247960608506 | KLF4/MYADM | 2 |
| BP | GO:0070587 | regulation of cell-cell adhesion involved in gastrulation | 2/26 | 11/18866 | 0.0000996835868734023 | 0.00675541641802007 | 0.00410247960608506 | KLF4/MYADM | 2 |
| BP | GO:1990440 | positive regulation of transcription from RNA polymerase II promoter in response to endoplasmic reticulum stress | 2/26 | 11/18866 | 0.0000996835868734023 | 0.00675541641802007 | 0.00410247960608506 | ATF3/DDIT3 | 2 |
| BP | GO:0001818 | negative regulation of cytokine production | 5/26 | 360/18866 | 0.000116345676706605 | 0.00675541641802007 | 0.00410247960608506 | ANXA1/KLF4/DDIT3/IFNG/RGCC | 5 |
| BP | GO:0062197 | cellular response to chemical stress | 5/26 | 360/18866 | 0.000116345676706605 | 0.00675541641802007 | 0.00410247960608506 | JUN/GPX8/ANXA1/KLF4/DDIT3 | 5 |
| BP | GO:0014745 | negative regulation of muscle adaptation | 2/26 | 12/18866 | 0.000119518905857278 | 0.00675541641802007 | 0.00410247960608506 | LMNA/KLF4 | 2 |
| BP | GO:0070586 | cell-cell adhesion involved in gastrulation | 2/26 | 12/18866 | 0.000119518905857278 | 0.00675541641802007 | 0.00410247960608506 | KLF4/MYADM | 2 |
| BP | GO:0031099 | regeneration | 4/26 | 201/18866 | 0.000155560999540051 | 0.00795837855563956 | 0.00483302341435601 | JUN/DUSP10/ANXA1/KLF4 | 4 |
| BP | GO:0045591 | positive regulation of regulatory T cell differentiation | 2/26 | 14/18866 | 0.00016451198830921 | 0.00795837855563956 | 0.00483302341435601 | DUSP10/IFNG | 2 |
| BP | GO:1903708 | positive regulation of hemopoiesis | 4/26 | 204/18866 | 0.000164669360846837 | 0.00795837855563956 | 0.00483302341435601 | JUN/DUSP10/ANXA1/IFNG | 4 |
| BP | GO:0042594 | response to starvation | 4/26 | 206/18866 | 0.000170952303573499 | 0.00795837855563956 | 0.00483302341435601 | JUN/ATF3/DDIT3/PMAIP1 | 4 |
| BP | GO:0070373 | negative regulation of ERK1 and ERK2 cascade | 3/26 | 79/18866 | 0.00017141123042916 | 0.00795837855563956 | 0.00483302341435601 | ATF3/DUSP10/KLF4 | 3 |
| BP | GO:1902043 | positive regulation of extrinsic apoptotic signaling pathway via death domain receptors | 3/26 | 15/18866 | 0.000189660651427072 | 0.00850202920190321 | 0.00516317562868616 | ATF3/PMAIP1 | 2 |
| BP | GO:0071277 | cellular response to calcium ion | 3/26 | 83/18866 | 0.000198434352272859 | 0.00859882193182387 | 0.00522195663875944 | JUN/JUND/FOSB | 3 |
| BP | GO:0097191 | extrinsic apoptotic signaling pathway | 4/26 | 230/18866 | 0.000260563398603757 | 0.0105042111401435 | 0.00637907559118028 | LMNA/ATF3/IFNG/PMAIP1 | 4 |
| BP | GO:0045582 | positive regulation of T cell differentiation | 3/26 | 92/18866 | 0.000268993285666005 | 0.0105042111401435 | 0.00637907559118028 | DUSP10/ANXA1/IFNG | 3 |
| BP | GO:0032677 | regulation of interleukin-8 production | 3/26 | 93/18866 | 0.000277705980469367 | 0.0105042111401435 | 0.00637907559118028 | ANXA1/KLF4/DDIT3 | 3 |
| BP | GO:0007050 | cell cycle arrest | 4/26 | 234/18866 | 0.000278251830398984 | 0.0105042111401435 | 0.00637907559118028 | MLF1/DDIT3/IFNG/RGCC | 4 |
| BP | GO:0045444 | fat cell differentiation | 4/26 | 235/18866 | 0.000282805684542326 | 0.0105042111401435 | 0.00637907559118028 | DUSP10/ARL4A/KLF4/DDIT3 | 4 |
| BP | GO:1901216 | positive regulation of neuron death | 3/26 | 97/18866 | 0.000314378714186084 | 0.0113525646789419 | 0.00689427004794045 | JUN/DDIT3/IFNG | 3 |
| BP | GO:0032637 | interleukin-8 production | 3/26 | 101/18866 | 0.000354043607256902 | 0.012439369984702 | 0.00755427327006192 | ANXA1/KLF4/DDIT3 | 3 |
| BP | GO:0036499 | PERK-mediated unfolded protein response | 2/26 | 21/18866 | 0.000377396988240305 | 0.0125798996080102 | 0.00763961514656487 | ATF3/DDIT3 | 2 |
| BP | GO:0140467 | integrated stress response signaling | 2/26 | 21/18866 | 0.000377396988240305 | 0.0125798996080102 | 0.00763961514656487 | ATF3/DDIT3 | 2 |
| BP | GO:0045621 | positive regulation of lymphocyte differentiation | 3/26 | 105/18866 | 0.000396801962622882 | 0.0128960637852437 | 0.00783161768334636 | DUSP10/ANXA1/IFNG | 3 |
| BP | GO:0032700 | negative regulation of interleukin-17 production | 2/26 | 22/18866 | 0.000414785024026766 | 0.0131517202740194 | 0.00798687466033567 | DDIT3/IFNG | 2 |
| BP | GO:0043618 | regulation of transcription from RNA polymerase II promoter in response to stress | 3/26 | 109/18866 | 0.000442753366414538 | 0.0137042708652119 | 0.0083224316995214 | JUN/ATF3/DDIT3 | 3 |
| BP | GO:0036003 | positive regulation of transcription from RNA polymerase II promoter in response to stress | 2/26 | 24/18866 | 0.000494748115734722 | 0.0149575011733753 | 0.00908350273686761 | ATF3/DDIT3 | 2 |
| BP | GO:0043620 | regulation of DNA-templated transcription in response to stress | 3/26 | 115/18866 | 0.00051788110305405 | 0.0153010325902333 | 0.00929212505479755 | JUN/ATF3/DDIT3 | 3 |
| BP | GO:2000679 | positive regulation of transcription regulatory region DNA binding | 2/26 | 25/18866 | 0.000537314237111335 | 0.0155224112943275 | 0.00942656556335675 | KLF4/IFNG | 2 |
| BP | GO:0034114 | regulation of heterotypic cell-cell adhesion | 2/26 | 26/18866 | 0.000581597466169847 | 0.016436450130887 | 0.00998164987705687 | KLF4/MYADM | 2 |
| BP | GO:1902105 | regulation of leukocyte differentiation | 4/26 | 290/18866 | 0.000626053932658867 | 0.0171709729739865 | 0.0104277163809635 | JUN/DUSP10/ANXA1/IFNG | 4 |
| BP | GO:0010633 | negative regulation of epithelial cell migration | 3/26 | 124/18866 | 0.000645160477460696 | 0.0171709729739865 | 0.0104277163809635 | DUSP10/KLF4/RGCC | 3 |
| BP | GO:0008637 | apoptotic mitochondrial changes | 3/26 | 125/18866 | 0.000660422037461019 | 0.0171709729739865 | 0.0104277163809635 | JUN/LMNA/PMAIP1 | 3 |
| BP | GO:0030968 | endoplasmic reticulum unfolded protein response | 3/26 | 125/18866 | 0.000660422037461019 | 0.0171709729739865 | 0.0104277163809635 | LMNA/ATF3/DDIT3 | 3 |
| BP | GO:0070372 | regulation of ERK1 and ERK2 cascade | 4/26 | 306/18866 | 0.000765395371352444 | 0.0193953161755901 | 0.0117785320904393 | JUN/ATF3/DUSP10/KLF4 | 4 |
| BP | GO:0043372 | positive regulation of CD4-positive, alpha-beta T cell differentiation | 2/26 | 30/18866 | 0.000775812647023605 | 0.0193953161755901 | 0.0117785320904393 | ANXA1/IFNG | 2 |
| BP | GO:0034599 | cellular response to oxidative stress | 4/26 | 310/18866 | 0.00080340458519253 | 0.0197061502028357 | 0.0119672976940297 | JUN/GPX8/ANXA1/KLF4 | 4 |
| BP | GO:0045589 | regulation of regulatory T cell differentiation | 2/26 | 32/18866 | 0.000883107656426054 | 0.0208734536973431 | 0.0126761864558764 | DUSP10/IFNG | 2 |
| BP | GO:1902235 | regulation of endoplasmic reticulum stress-induced intrinsic apoptotic signaling pathway | 2/26 | 32/18866 | 0.000883107656426054 | 0.0208734536973431 | 0.0126761864558764 | DDIT3/PMAIP1 | 2 |
| BP | GO:0070371 | ERK1 and ERK2 cascade | 4/26 | 325/18866 | 0.000957909144915003 | 0.0221563058537043 | 0.0134552464698609 | JUN/ATF3/DUSP10/KLF4 | 4 |
| BP | GO:0050715 | positive regulation of cytokine secretion | 2/26 | 34/18866 | 0.000997147281706911 | 0.0221563058537043 | 0.0134552464698609 | IFNG/RGCC | 2 |
| BP | GO:1903037 | regulation of leukocyte cell-cell adhesion | 4/26 | 329/18866 | 0.00100241903189326 | 0.0221563058537043 | 0.0134552464698609 | DUSP10/ANXA1/KLF4/IFNG | 4 |
| BP | GO:0034620 | cellular response to unfolded protein | 3/26 | 146/18866 | 0.00103596737707384 | 0.0221563058537043 | 0.0134552464698609 | LMNA/ATF3/DDIT3 | 3 |
| BP | GO:0042542 | response to hydrogen peroxide | 3/26 | 146/18866 | 0.00103596737707384 | 0.0221563058537043 | 0.0134552464698609 | JUN/ANXA1/KLF4 | 3 |
| BP | GO:0051592 | response to calcium ion | 3/26 | 147/18866 | 0.00105658570379253 | 0.0221563058537043 | 0.0134552464698609 | JUN/JUND/FOSB | 3 |
| BP | GO:0045066 | regulatory T cell differentiation | 2/26 | 35/18866 | 0.00105668535609974 | 0.0221563058537043 | 0.0134552464698609 | DUSP10/IFNG | 2 |
| BP | GO:2000516 | positive regulation of CD4-positive, alpha-beta T cell activation | 2/26 | 36/18866 | 0.00111789643760601 | 0.0227499598385796 | 0.0138157650841577 | ANXA1/IFNG | 2 |
| BP | GO:0045580 | regulation of T cell differentiation | 3/26 | 150/18866 | 0.00111999802282238 | 0.0227499598385796 | 0.0138157650841577 | DUSP10/ANXA1/IFNG | 3 |
| BP | GO:0032717 | negative regulation of interleukin-8 production | 2/26 | 37/18866 | 0.00118077616077882 | 0.0236155232155765 | 0.0143414108596618 | ANXA1/KLF4 | 2 |
| BP | GO:0062013 | positive regulation of small molecule metabolic process | 3/26 | 154/18866 | 0.00120822877711045 | 0.0237984456097514 | 0.0144524973338571 | ANXA1/IFNG/PMAIP1 | 3 |
| BP | GO:1905898 | positive regulation of response to endoplasmic reticulum stress | 2/26 | 38/18866 | 0.00124532016823157 | 0.0241629286373289 | 0.0146738433020216 | DDIT3/PMAIP1 | 2 |
| BP | GO:0032660 | regulation of interleukin-17 production | 2/26 | 39/18866 | 0.00131152411062526 | 0.0250732550560711 | 0.0152266731109744 | DDIT3/IFNG | 2 |
| BP | GO:1902895 | positive regulation of pri-miRNA transcription by RNA polymerase II | 2/26 | 40/18866 | 0.00137938364665598 | 0.0259300854154263 | 0.0157470154344694 | JUN/KLF4 | 2 |
| BP | GO:2001236 | regulation of extrinsic apoptotic signaling pathway | 3/26 | 162/18866 | 0.00139760862924574 | 0.0259300854154263 | 0.0157470154344694 | LMNA/ATF3/PMAIP1 | 3 |
| BP | GO:0009267 | cellular response to starvation | 3/26 | 163/18866 | 0.00142251594373343 | 0.0259300854154263 | 0.0157470154344694 | JUN/ATF3/PMAIP1 | 3 |
| BP | GO:0043535 | regulation of blood vessel endothelial cell migration | 3/26 | 164/18866 | 0.00144770165560969 | 0.0259300854154263 | 0.0157470154344694 | ANXA1/KLF4/RGCC | 3 |
| BP | GO:0007159 | leukocyte cell-cell adhesion | 4/26 | 364/18866 | 0.00145624189135968 | 0.0259300854154263 | 0.0157470154344694 | DUSP10/ANXA1/KLF4/IFNG | 4 |
| BP | GO:0035967 | cellular response to topologically incorrect protein | 3/26 | 166/18866 | 0.00149891299046992 | 0.0259300854154263 | 0.0157470154344694 | LMNA/ATF3/DDIT3 | 3 |
| BP | GO:0051098 | regulation of binding | 4/26 | 367/18866 | 0.00150083724481864 | 0.0259300854154263 | 0.0157470154344694 | JUN/KLF4/DDIT3/IFNG | 4 |
| BP | GO:0030098 | lymphocyte differentiation | 4/26 | 368/18866 | 0.00151591268582492 | 0.0259300854154263 | 0.0157470154344694 | DUSP10/ANXA1/KLF6/IFNG | 4 |
| BP | GO:0010470 | regulation of gastrulation | 2/26 | 43/18866 | 0.00159285252379315 | 0.0267454669536243 | 0.0162421864090836 | KLF4/MYADM | 2 |
| BP | GO:0034614 | cellular response to reactive oxygen species | 3/26 | 170/18866 | 0.00160472801721746 | 0.0267454669536243 | 0.0162421864090836 | JUN/ANXA1/KLF4 | 3 |
| BP | GO:0032620 | interleukin-17 production | 2/26 | 44/18866 | 0.00166729118159437 | 0.0274152767503379 | 0.016648953492108 | DDIT3/IFNG | 2 |
| BP | GO:0048660 | regulation of smooth muscle cell proliferation | 3/26 | 173/18866 | 0.00168709395386695 | 0.0274152767503379 | 0.016648953492108 | JUN/KLF4/IFNG | 3 |
| BP | GO:0045429 | positive regulation of nitric oxide biosynthetic process | 2/26 | 45/18866 | 0.00174336384659954 | 0.0276400998245234 | 0.0167854857233948 | KLF4/IFNG | 2 |
| BP | GO:0048659 | smooth muscle cell proliferation | 3/26 | 175/18866 | 0.00174345245046994 | 0.0276400998245234 | 0.0167854857233948 | JUN/KLF4/IFNG | 3 |
| BP | GO:0010634 | positive regulation of epithelial cell migration | 3/26 | 176/18866 | 0.00177206943403603 | 0.0277553043885162 | 0.0168554480092203 | JUN/ANXA1/IFNG | 3 |
| BP | GO:1904407 | positive regulation of nitric oxide metabolic process | 2/26 | 46/18866 | 0.00182106622545175 | 0.0279251347711851 | 0.0169585838691408 | KLF4/IFNG | 2 |
| BP | GO:0046638 | positive regulation of alpha-beta T cell differentiation | 2/26 | 47/18866 | 0.00190039403274149 | 0.0279251347711851 | 0.0169585838691408 | ANXA1/IFNG | 2 |
| BP | GO:0045619 | regulation of lymphocyte differentiation | 3/26 | 181/18866 | 0.00191957607332113 | 0.0279251347711851 | 0.0169585838691408 | DUSP10/ANXA1/IFNG | 3 |
| BP | GO:0050678 | regulation of epithelial cell proliferation | 4/26 | 395/18866 | 0.00196426650418121 | 0.0279251347711851 | 0.0169585838691408 | JUN/DUSP10/ZNF703/RGCC | 4 |
| BP | GO:0006986 | response to unfolded protein | 3/26 | 183/18866 | 0.00198066264628366 | 0.0279251347711851 | 0.0169585838691408 | LMNA/ATF3/DDIT3 | 3 |
| BP | GO:1903034 | regulation of response to wounding | 3/26 | 183/18866 | 0.00198066264628366 | 0.0279251347711851 | 0.0169585838691408 | DUSP10/ANXA1/KLF4 | 3 |
| BP | GO:2001235 | positive regulation of apoptotic signaling pathway | 3/26 | 183/18866 | 0.00198066264628366 | 0.0279251347711851 | 0.0169585838691408 | ATF3/DDIT3/PMAIP1 | 3 |
| BP | GO:0043370 | regulation of CD4-positive, alpha-beta T cell differentiation | 2/26 | 48/18866 | 0.00198134299099425 | 0.0279251347711851 | 0.0169585838691408 | ANXA1/IFNG | 2 |
| BP | GO:0042493 | response to drug | 4/26 | 397/18866 | 0.00200076366167061 | 0.0279251347711851 | 0.0169585838691408 | ANXA1/CD69/CYP2F1/FOSB | 4 |
| BP | GO:2000045 | regulation of G1/S transition of mitotic cell cycle | 3/26 | 185/18866 | 0.00204295300878423 | 0.0279251347711851 | 0.0169585838691408 | ANXA1/KLF4/RGCC | 3 |
| BP | GO:0090199 | regulation of release of cytochrome c from mitochondria | 2/26 | 49/18866 | 0.00206390883065808 | 0.0279251347711851 | 0.0169585838691408 | LMNA/PMAIP1 | 2 |
| BP | GO:1900087 | positive regulation of G1/S transition of mitotic cell cycle | 2/26 | 49/18866 | 0.00206390883065808 | 0.0279251347711851 | 0.0169585838691408 | ANXA1/RGCC | 2 |
| BP | GO:0043409 | negative regulation of MAPK cascade | 3/26 | 187/18866 | 0.00210645569371089 | 0.0279251347711851 | 0.0169585838691408 | ATF3/DUSP10/KLF4 | 3 |
| BP | GO:0001774 | microglial cell activation | 2/26 | 50/18866 | 0.00214808729009116 | 0.0279251347711851 | 0.0169585838691408 | JUN/IFNG | 2 |
| BP | GO:0002269 | leukocyte activation involved in inflammatory response | 2/26 | 50/18866 | 0.00214808729009116 | 0.0279251347711851 | 0.0169585838691408 | JUN/IFNG | 2 |
| BP | GO:0010718 | positive regulation of epithelial to mesenchymal transition | 2/26 | 50/18866 | 0.00214808729009116 | 0.0279251347711851 | 0.0169585838691408 | ZNF703/RGCC | 2 |
| BP | GO:0050873 | brown fat cell differentiation | 2/26 | 50/18866 | 0.00214808729009116 | 0.0279251347711851 | 0.0169585838691408 | DUSP10/ARL4A | 2 |
| BP | GO:0043534 | blood vessel endothelial cell migration | 3/26 | 189/18866 | 0.00217117914709366 | 0.0279458702101164 | 0.0169711762409614 | ANXA1/KLF4/RGCC | 3 |
| BP | GO:0006984 | ER-nucleus signaling pathway | 2/26 | 51/18866 | 0.00223387411554944 | 0.0281945276719833 | 0.017122182796751 | ATF3/DDIT3 | 2 |
| BP | GO:1902893 | regulation of pri-miRNA transcription by RNA polymerase II | 2/26 | 51/18866 | 0.00223387411554944 | 0.0281945276719833 | 0.017122182796751 | JUN/KLF4 | 2 |
| BP | GO:0071248 | cellular response to metal ion | 3/26 | 193/18866 | 0.00230432171173932 | 0.0282022857899673 | 0.0171268942044336 | JUN/JUND/FOSB | 3 |
| BP | GO:2001233 | regulation of apoptotic signaling pathway | 4/26 | 413/18866 | 0.00230991594712934 | 0.0282022857899673 | 0.0171268942044336 | LMNA/ATF3/DDIT3/PMAIP1 | 4 |
| BP | GO:0031103 | axon regeneration | 2/26 | 52/18866 | 0.00232126506117423 | 0.0282022857899673 | 0.0171268942044336 | JUN/KLF4 | 2 |
| BP | GO:2001238 | positive regulation of extrinsic apoptotic signaling pathway | 2/26 | 52/18866 | 0.00232126506117423 | 0.0282022857899673 | 0.0171268942044336 | ATF3/PMAIP1 | 2 |
| BP | GO:0043392 | negative regulation of DNA binding | 2/26 | 53/18866 | 0.00241025588897983 | 0.0287461711529704 | 0.0174571889592938 | JUN/DDIT3 | 2 |
| BP | GO:0061614 | pri-miRNA transcription by RNA polymerase II | 2/26 | 53/18866 | 0.00241025588897983 | 0.0287461711529704 | 0.0174571889592938 | JUN/KLF4 | 2 |
| BP | GO:0050727 | regulation of inflammatory response | 4/26 | 425/18866 | 0.00256248124943624 | 0.0302838693115192 | 0.0183910137519348 | DUSP10/ANXA1/KLF4/IFNG | 4 |
| BP | GO:0045785 | positive regulation of cell adhesion | 4/26 | 428/18866 | 0.00262848639808236 | 0.0307840749324962 | 0.0186947823476697 | DUSP10/ANXA1/IFNG/MYADM | 4 |
| BP | GO:0035966 | response to topologically incorrect protein | 3/26 | 205/18866 | 0.00273389965164682 | 0.031679138237933 | 0.0192383430594735 | LMNA/ATF3/DDIT3 | 3 |
| BP | GO:1902806 | regulation of cell cycle G1/S phase transition | 3/26 | 206/18866 | 0.00277177572083017 | 0.031679138237933 | 0.0192383430594735 | ANXA1/KLF4/RGCC | 3 |
| BP | GO:0071456 | cellular response to hypoxia | 3/26 | 208/18866 | 0.00284850137957391 | 0.031679138237933 | 0.0192383430594735 | LMNA/RGCC/PMAIP1 | 3 |
| BP | GO:0002763 | positive regulation of myeloid leukocyte differentiation | 2/26 | 58/18866 | 0.0028790604807779 | 0.031679138237933 | 0.0192383430594735 | JUN/IFNG | 2 |
| BP | GO:0031102 | neuron projection regeneration | 2/26 | 59/18866 | 0.00297756204330439 | 0.031679138237933 | 0.0192383430594735 | JUN/KLF4 | 2 |
| BP | GO:0043525 | positive regulation of neuron apoptotic process | 2/26 | 59/18866 | 0.00297756204330439 | 0.031679138237933 | 0.0192383430594735 | JUN/DDIT3 | 2 |
| BP | GO:0050707 | regulation of cytokine secretion | 2/26 | 59/18866 | 0.00297756204330439 | 0.031679138237933 | 0.0192383430594735 | IFNG/RGCC | 2 |
| BP | GO:0001819 | positive regulation of cytokine production | 4/26 | 447/18866 | 0.00307404310950748 | 0.031679138237933 | 0.0192383430594735 | ANXA1/DDIT3/IFNG/RGCC | 4 |
| BP | GO:0043388 | positive regulation of DNA binding | 2/26 | 60/18866 | 0.00307763404152147 | 0.031679138237933 | 0.0192383430594735 | KLF4/IFNG | 2 |
| BP | GO:0061900 | glial cell activation | 2/26 | 60/18866 | 0.00307763404152147 | 0.031679138237933 | 0.0192383430594735 | JUN/IFNG | 2 |
| BP | GO:1902808 | positive regulation of cell cycle G1/S phase transition | 2/26 | 60/18866 | 0.00307763404152147 | 0.031679138237933 | 0.0192383430594735 | ANXA1/RGCC | 2 |
| BP | GO:1903428 | positive regulation of reactive oxygen species biosynthetic process | 2/26 | 60/18866 | 0.00307763404152147 | 0.031679138237933 | 0.0192383430594735 | KLF4/IFNG | 2 |
| BP | GO:0050870 | positive regulation of T cell activation | 3/26 | 214/18866 | 0.00308653410505488 | 0.031679138237933 | 0.0192383430594735 | DUSP10/ANXA1/IFNG | 3 |
| BP | GO:1902041 | regulation of extrinsic apoptotic signaling pathway via death domain receptors | 2/26 | 61/18866 | 0.00317927229998459 | 0.031679138237933 | 0.0192383430594735 | ATF3/PMAIP1 | 2 |
| BP | GO:0050673 | epithelial cell proliferation | 4/26 | 453/18866 | 0.00322489266417473 | 0.031679138237933 | 0.0192383430594735 | JUN/DUSP10/ZNF703/RGCC | 4 |
| BP | GO:0036294 | cellular response to decreased oxygen levels | 3/26 | 218/18866 | 0.00325184282030211 | 0.031679138237933 | 0.0192383430594735 | LMNA/RGCC/PMAIP1 | 3 |
| BP | GO:0051090 | regulation of DNA-binding transcription factor activity | 4/26 | 455/18866 | 0.00327628586640688 | 0.031679138237933 | 0.0192383430594735 | JUN/KLF4/DDIT3/RGCC | 4 |
| BP | GO:0002294 | CD4-positive, alpha-beta T cell differentiation involved in immune response | 2/26 | 62/18866 | 0.00328247265101175 | 0.031679138237933 | 0.0192383430594735 | ANXA1/IFNG | 2 |
| BP | GO:0034113 | heterotypic cell-cell adhesion | 2/26 | 62/18866 | 0.00328247265101175 | 0.031679138237933 | 0.0192383430594735 | KLF4/MYADM | 2 |
| BP | GO:2001244 | positive regulation of intrinsic apoptotic signaling pathway | 2/26 | 62/18866 | 0.00328247265101175 | 0.031679138237933 | 0.0192383430594735 | DDIT3/PMAIP1 | 2 |
| BP | GO:0006979 | response to oxidative stress | 4/26 | 458/18866 | 0.00335442678746496 | 0.031679138237933 | 0.0192383430594735 | JUN/GPX8/ANXA1/KLF4 | 4 |
| BP | GO:0031669 | cellular response to nutrient levels | 3/26 | 221/18866 | 0.00337934107695584 | 0.031679138237933 | 0.0192383430594735 | JUN/ATF3/PMAIP1 | 3 |
| BP | GO:0071241 | cellular response to inorganic substance | 3/26 | 221/18866 | 0.00337934107695584 | 0.031679138237933 | 0.0192383430594735 | JUN/JUND/FOSB | 3 |
| BP | GO:0002287 | alpha-beta T cell activation involved in immune response | 2/26 | 63/18866 | 0.0033872309346713 | 0.031679138237933 | 0.0192383430594735 | ANXA1/IFNG | 2 |
| BP | GO:0002293 | alpha-beta T cell differentiation involved in immune response | 2/26 | 63/18866 | 0.0033872309346713 | 0.031679138237933 | 0.0192383430594735 | ANXA1/IFNG | 2 |
| BP | GO:0046635 | positive regulation of alpha-beta T cell activation | 2/26 | 63/18866 | 0.0033872309346713 | 0.031679138237933 | 0.0192383430594735 | ANXA1/IFNG | 2 |
| BP | GO:0070059 | intrinsic apoptotic signaling pathway in response to endoplasmic reticulum stress | 2/26 | 63/18866 | 0.0033872309346713 | 0.031679138237933 | 0.0192383430594735 | DDIT3/PMAIP1 | 2 |
| BP | GO:2000514 | regulation of CD4-positive, alpha-beta T cell activation | 2/26 | 63/18866 | 0.0033872309346713 | 0.031679138237933 | 0.0192383430594735 | ANXA1/IFNG | 2 |
| BP | GO:0046637 | regulation of alpha-beta T cell differentiation | 2/26 | 64/18866 | 0.00349354299876976 | 0.0322099709106432 | 0.019560711079338 | ANXA1/IFNG | 2 |
| BP | GO:0051898 | negative regulation of protein kinase B signaling | 2/26 | 64/18866 | 0.00349354299876976 | 0.0322099709106432 | 0.019560711079338 | KLF4/DDIT3 | 2 |
| BP | GO:0031667 | response to nutrient levels | 4/26 | 473/18866 | 0.00376439211802723 | 0.0344627447425028 | 0.0209287923537467 | JUN/ATF3/DDIT3/PMAIP1 | 4 |
| BP | GO:1903672 | positive regulation of sprouting angiogenesis | 2/26 | 67/18866 | 0.00382176046758135 | 0.0347432769780123 | 0.0210991560595216 | ANXA1/KLF4 | 2 |
| BP | GO:0045428 | regulation of nitric oxide biosynthetic process | 2/26 | 68/18866 | 0.00393424628583914 | 0.0353204349730279 | 0.0214496568662113 | KLF4/IFNG | 2 |
| BP | GO:0000302 | response to reactive oxygen species | 3/26 | 235/18866 | 0.00401491360471841 | 0.0353204349730279 | 0.0214496568662113 | JUN/ANXA1/KLF4 | 3 |
| BP | GO:0071453 | cellular response to oxygen levels | 3/26 | 235/18866 | 0.00401491360471841 | 0.0353204349730279 | 0.0214496568662113 | LMNA/RGCC/PMAIP1 | 3 |
| BP | GO:1903039 | positive regulation of leukocyte cell-cell adhesion | 3/26 | 235/18866 | 0.00401491360471841 | 0.0353204349730279 | 0.0214496568662113 | DUSP10/ANXA1/IFNG | 3 |
| BP | GO:0048662 | negative regulation of smooth muscle cell proliferation | 2/26 | 69/18866 | 0.00404826523921627 | 0.0353204349730279 | 0.0214496568662113 | KLF4/IFNG | 2 |
| BP | GO:2000573 | positive regulation of DNA biosynthetic process | 2/26 | 69/18866 | 0.00404826523921627 | 0.0353204349730279 | 0.0214496568662113 | KLF4/RGCC | 2 |
| BP | GO:0010594 | regulation of endothelial cell migration | 3/26 | 238/18866 | 0.00415994644632117 | 0.0360528692014501 | 0.0218944549806377 | ANXA1/KLF4/RGCC | 3 |
| BP | GO:0002292 | T cell differentiation involved in immune response | 2/26 | 71/18866 | 0.00428088613490569 | 0.0368553110952145 | 0.0223817678715878 | ANXA1/IFNG | 2 |
| BP | GO:0050663 | cytokine secretion | 2/26 | 72/18866 | 0.00439947988812813 | 0.0376271306221485 | 0.022850484183491 | IFNG/RGCC | 2 |
| BP | GO:0033002 | muscle cell proliferation | 3/26 | 244/18866 | 0.00445953827867072 | 0.0378915017141957 | 0.0230110334296735 | JUN/KLF4/IFNG | 3 |
| BP | GO:1903706 | regulation of hemopoiesis | 4/26 | 498/18866 | 0.0045216826190478 | 0.038170048082871 | 0.0231801911434439 | JUN/DUSP10/ANXA1/IFNG | 4 |
| BP | GO:0030217 | T cell differentiation | 3/26 | 253/18866 | 0.00493305381083916 | 0.041108781756993 | 0.024964847220846 | DUSP10/ANXA1/IFNG | 3 |
| BP | GO:0031668 | cellular response to extracellular stimulus | 3/26 | 253/18866 | 0.00493305381083916 | 0.041108781756993 | 0.024964847220846 | JUN/ATF3/PMAIP1 | 3 |
| BP | GO:0150076 | neuroinflammatory response | 2/26 | 77/18866 | 0.00501511861243506 | 0.0415264598481884 | 0.0252184978835152 | JUN/IFNG | 2 |
| BP | GO:0043367 | CD4-positive, alpha-beta T cell differentiation | 2/26 | 78/18866 | 0.00514275192691838 | 0.0423137816771766 | 0.0256966285488926 | ANXA1/IFNG | 2 |
| BP | GO:0006809 | nitric oxide biosynthetic process | 2/26 | 79/18866 | 0.00527187765929473 | 0.0428340059817696 | 0.0260125542399411 | KLF4/IFNG | 2 |
| BP | GO:0042246 | tissue regeneration | 2/26 | 79/18866 | 0.00527187765929473 | 0.0428340059817696 | 0.0260125542399411 | DUSP10/ANXA1 | 2 |
| BP | GO:0048678 | response to axon injury | 2/26 | 80/18866 | 0.00540249177953991 | 0.0436226044310676 | 0.0264914601808103 | JUN/KLF4 | 2 |
| BP | GO:0045913 | positive regulation of carbohydrate metabolic process | 2/26 | 84/18866 | 0.00593975180216105 | 0.0473722536368673 | 0.0287685750831178 | IFNG/PMAIP1 | 2 |
| BP | GO:0046209 | nitric oxide metabolic process | 2/26 | 84/18866 | 0.00593975180216105 | 0.0473722536368673 | 0.0287685750831178 | KLF4/IFNG | 2 |
| BP | GO:0001776 | leukocyte homeostasis | 2/26 | 86/18866 | 0.00621720791267354 | 0.0492827456492415 | 0.0299287929043977 | ANXA1/PMAIP1 | 2 |
| BP | GO:0098742 | cell-cell adhesion via plasma-membrane adhesion molecules | 3/26 | 277/18866 | 0.00634103496891238 | 0.0494944137741056 | 0.0300573363000641 | IGSF9/KLF4/MYADM | 3 |
| BP | GO:0090049 | regulation of cell migration involved in sprouting angiogenesis | 2/26 | 87/18866 | 0.00635812853867357 | 0.0494944137741056 | 0.0300573363000641 | ANXA1/KLF4 | 2 |
| BP | GO:2001057 | reactive nitrogen species metabolic process | 2/26 | 87/18866 | 0.00635812853867357 | 0.0494944137741056 | 0.0300573363000641 | KLF4/IFNG | 2 |
| CC | GO:0005719 | nuclear euchromatin | 2/26 | 34/19559 | 0.000928628577047607 | 0.0286008424116407 | 0.0234158943721035 | JUN/KLF4 | 2 |
| CC | GO:0090575 | RNA polymerase II transcription regulator complex | 3/26 | 161/19559 | 0.00123845305048432 | 0.0286008424116407 | 0.0234158943721035 | JUN/DDIT3/JUND | 3 |
| CC | GO:0000791 | euchromatin | 2/26 | 42/19559 | 0.00141594129453692 | 0.0286008424116407 | 0.0234158943721035 | JUN/KLF4 | 2 |
| CC | GO:0005667 | transcription regulator complex | 4/26 | 413/19559 | 0.00202679161492726 | 0.0286008424116407 | 0.0234158943721035 | JUN/KLF4/DDIT3/JUND | 4 |
| CC | GO:0031514 | motile cilium | 3/26 | 199/19559 | 0.00226990812790799 | 0.0286008424116407 | 0.0234158943721035 | ANXA1/CFAP43/CFAP20 | 3 |
| MF | GO:0140297 | DNA-binding transcription factor binding | 5/26 | 347/18352 | 0.0000913672640572482 | 0.00858852282138133 | 0.0065399725851504 | JUN/ZNF703/KLF4/DDIT3/JUND | 5 |
| MF | GO:0070412 | R-SMAD binding | 2/26 | 23/18352 | 0.000442903856070514 | 0.0208164812353142 | 0.015851295901471 | JUN/RGCC | 2 |
|  |  |  |  |  |  |  |  |  |  |
| **KEGG** |  |  |  |  |  |  |  |  |  |
|  | ID | Description | GeneRatio | BgRatio | pvalue | p.adjust | qvalue | geneID | Count |
|  | hsa04657 | IL-17 signaling pathway | 4/12 | 94/8086 | 0.0000078953579419732 | 0.000757954362429428 | 0.000606695926067415 | 3725/3458/3727/2354 | 4 |
|  | hsa04380 | Osteoclast differentiation | 4/12 | 128/8086 | 0.0000268807401970698 | 0.00109231809437447 | 0.000874333562383073 | 3725/3458/3727/2354 | 4 |
|  | hsa04210 | Apoptosis | 4/12 | 136/8086 | 0.0000341349404492022 | 0.00109231809437447 | 0.000874333562383073 | 3725/4000/1649/5366 | 4 |
|  | hsa04010 | MAPK signaling pathway | 4/12 | 294/8086 | 0.000672514415323602 | 0.0161403459677664 | 0.0129193558733218 | 3725/11221/1649/3727 | 4 |
|  | hsa05030 | Cocaine addiction | 2/12 | 49/8086 | 0.00228418737033254 | 0.0438563975103847 | 0.0351043532703737 | 3725/2354 | 2 |
