# Supplementary material for: Identification of Diagnostic Biomarkers of Rape Pollen Allergy Based on MRNA Sequencing
Source: Hindawi journal article supplement (doi:10.1155/2022/6153577), 2022-09-28
Supplement: f1 [file 6153577.f1.zip › 6153577.f1/Table S7.docx]

| Table S7: Correlations of rape pollen allergy-associated genes with differential immune cells between the rape pollen allergic group and rape pollen non-allergic group | | | | |
| --- | --- | --- | --- | --- |
| gene | immune_cells | cor | p.value | abs |
| LMNA | Macrophages | 0.582323069 | 0.017940033 | 0.582323069 |
| IGSF9 | Macrophages | 0.617371517 | 0.0108333 | 0.617371517 |
| KIF9 | Macrophages | 0.595550969 | 0.014926422 | 0.595550969 |
| MLF1 | Macrophages | 0.556964816 | 0.025018423 | 0.556964816 |
| GPX8 | Macrophages | 0.545513991 | 0.028841306 | 0.545513991 |
| ARL4A | Macrophages | 0.57154701 | 0.020727381 | 0.57154701 |
| ZNF703 | Macrophages | 0.615456269 | 0.011152439 | 0.615456269 |
| LETM2 | Macrophages | 0.535254828 | 0.032631063 | 0.535254828 |
| ANXA1 | Macrophages | 0.52770255 | 0.035653977 | 0.52770255 |
| KLF4 | Macrophages | 0.63850761 | 0.007766594 | 0.63850761 |
| RRP12 | Macrophages | 0.728795674 | 0.001362162 | 0.728795674 |
| CFAP43 | Macrophages | 0.51784139 | 0.039914163 | 0.51784139 |
| DDIT3 | Macrophages | 0.590702923 | 0.015981083 | 0.590702923 |
| RGCC | Macrophages | 0.50563555 | 0.045704578 | 0.50563555 |
| CFAP20 | Macrophages | 0.567867365 | 0.021752029 | 0.567867365 |
| PMAIP1 | Macrophages | 0.509505111 | 0.043804993 | 0.509505111 |
| CYP2F1 | Macrophages | 0.512442358 | 0.04240303 | 0.512442358 |
| MYADM | Macrophages | 0.637369803 | 0.00791174 | 0.637369803 |
| LMNA | T cells | -0.572744613 | 0.020402068 | 0.572744613 |
| IGSF9 | T cells | -0.616747708 | 0.010936446 | 0.616747708 |
| ARL4A | T cells | -0.516085103 | 0.040711395 | 0.516085103 |
| KLF4 | T cells | -0.537709467 | 0.031691745 | 0.537709467 |
| RRP12 | T cells | -0.636750491 | 0.007991643 | 0.636750491 |
| CFAP43 | T cells | -0.576030584 | 0.019529723 | 0.576030584 |
| MYADM | T cells | -0.683845097 | 0.003487213 | 0.683845097 |
| LMNA | T helper cells | -0.647029077 | 0.006745444 | 0.647029077 |
| IGSF9 | T helper cells | -0.651235668 | 0.006282402 | 0.651235668 |
| DUSP10 | T helper cells | -0.562380677 | 0.023351904 | 0.562380677 |
| KIF9 | T helper cells | -0.61739318 | 0.010829732 | 0.61739318 |
| ARL4A | T helper cells | -0.585378228 | 0.017205379 | 0.585378228 |
| ZNF703 | T helper cells | -0.579734577 | 0.018581324 | 0.579734577 |
| LETM2 | T helper cells | -0.552117131 | 0.026586165 | 0.552117131 |
| KLF4 | T helper cells | -0.602300965 | 0.01354938 | 0.602300965 |
| RRP12 | T helper cells | -0.69779227 | 0.002651111 | 0.69779227 |
| CFAP43 | T helper cells | -0.67821367 | 0.003879793 | 0.67821367 |
| CD69 | T helper cells | -0.533842228 | 0.033181118 | 0.533842228 |
| DDIT3 | T helper cells | -0.544400497 | 0.029235542 | 0.544400497 |
| IFNG | T helper cells | -0.505328363 | 0.045857971 | 0.505328363 |
| CFAP20 | T helper cells | -0.54900677 | 0.027630958 | 0.54900677 |
| PMAIP1 | T helper cells | -0.575509862 | 0.019666001 | 0.575509862 |
| JUND | T helper cells | -0.553303068 | 0.026195868 | 0.553303068 |
| MYADM | T helper cells | -0.728280405 | 0.001378291 | 0.728280405 |
| JUN | TFH | -0.555085887 | 0.025617412 | 0.555085887 |
| LMNA | TFH | -0.612498596 | 0.011659759 | 0.612498596 |
| IGSF9 | TFH | -0.665193033 | 0.004924334 | 0.665193033 |
| ATF3 | TFH | -0.65070703 | 0.006339159 | 0.65070703 |
| DUSP10 | TFH | -0.627096005 | 0.009322108 | 0.627096005 |
| KIF9 | TFH | -0.625426527 | 0.009568935 | 0.625426527 |
| MLF1 | TFH | -0.587169841 | 0.016785572 | 0.587169841 |
| GPX8 | TFH | -0.655305863 | 0.005858839 | 0.655305863 |
| ARL4A | TFH | -0.741042914 | 0.001021755 | 0.741042914 |
| ZNF703 | TFH | -0.762946947 | 0.000586632 | 0.762946947 |
| LETM2 | TFH | -0.637126562 | 0.007943047 | 0.637126562 |
| ANXA1 | TFH | -0.699461821 | 0.00256299 | 0.699461821 |
| KLF4 | TFH | -0.736344977 | 0.001142958 | 0.736344977 |
| KLF6 | TFH | -0.64545577 | 0.006925444 | 0.64545577 |
| RRP12 | TFH | -0.763912614 | 0.000571704 | 0.763912614 |
| CFAP43 | TFH | -0.685502026 | 0.003378013 | 0.685502026 |
| CD69 | TFH | -0.560259162 | 0.023994215 | 0.560259162 |
| DDIT3 | TFH | -0.739462631 | 0.00106129 | 0.739462631 |
| IFNG | TFH | -0.534214134 | 0.033035624 | 0.534214134 |
| RGCC | TFH | -0.608018418 | 0.012462579 | 0.608018418 |
| CFAP20 | TFH | -0.614371496 | 0.011336448 | 0.614371496 |
| PMAIP1 | TFH | -0.676462809 | 0.004008833 | 0.676462809 |
| JUND | TFH | -0.59751507 | 0.01451495 | 0.59751507 |
| CYP2F1 | TFH | -0.652161261 | 0.006184002 | 0.652161261 |
| FOSB | TFH | -0.585060682 | 0.01728063 | 0.585060682 |
| MYADM | TFH | -0.74479954 | 0.00093259 | 0.74479954 |
| JUN | Tgd | 0.585329718 | 0.017216859 | 0.585329718 |
| LMNA | Tgd | 0.678732315 | 0.003842216 | 0.678732315 |
| IGSF9 | Tgd | 0.501627692 | 0.047736244 | 0.501627692 |
| DUSP10 | Tgd | 0.700625007 | 0.002503008 | 0.700625007 |
| KIF9 | Tgd | 0.704116152 | 0.002329768 | 0.704116152 |
| MLF1 | Tgd | 0.658594002 | 0.005533577 | 0.658594002 |
| LETM2 | Tgd | 0.584412692 | 0.01743498 | 0.584412692 |
| CFAP43 | Tgd | 0.65171246 | 0.00623156 | 0.65171246 |
| CD69 | Tgd | 0.616752575 | 0.010935638 | 0.616752575 |
| IFNG | Tgd | 0.722498802 | 0.001570195 | 0.722498802 |
| CFAP20 | Tgd | 0.616408685 | 0.010992826 | 0.616408685 |
| PMAIP1 | Tgd | 0.656114526 | 0.005777467 | 0.656114526 |
| JUND | Tgd | 0.588321341 | 0.01651999 | 0.588321341 |
| MYADM | Tgd | 0.552440715 | 0.026479234 | 0.552440715 |
| JUN | Th17 cells | -0.503583275 | 0.046736681 | 0.503583275 |
| LMNA | Th17 cells | -0.6834612 | 0.003512915 | 0.6834612 |
| IGSF9 | Th17 cells | -0.582163156 | 0.017979146 | 0.582163156 |
| DUSP10 | Th17 cells | -0.647802987 | 0.006658279 | 0.647802987 |
| KIF9 | Th17 cells | -0.587567049 | 0.016693588 | 0.587567049 |
| MLF1 | Th17 cells | -0.559834397 | 0.024124433 | 0.559834397 |
| ARL4A | Th17 cells | -0.536299072 | 0.032228913 | 0.536299072 |
| ZNF703 | Th17 cells | -0.517495702 | 0.040070145 | 0.517495702 |
| LETM2 | Th17 cells | -0.521905214 | 0.038114534 | 0.521905214 |
| KLF4 | Th17 cells | -0.541281015 | 0.030361907 | 0.541281015 |
| RRP12 | Th17 cells | -0.640290431 | 0.007543422 | 0.640290431 |
| CFAP43 | Th17 cells | -0.617665547 | 0.010784949 | 0.617665547 |
| CD69 | Th17 cells | -0.533023101 | 0.033503286 | 0.533023101 |
| DDIT3 | Th17 cells | -0.53893187 | 0.031231706 | 0.53893187 |
| IFNG | Th17 cells | -0.510904992 | 0.04313256 | 0.510904992 |
| CFAP20 | Th17 cells | -0.511423255 | 0.042885585 | 0.511423255 |
| PMAIP1 | Th17 cells | -0.62894005 | 0.009055348 | 0.62894005 |
| JUND | Th17 cells | -0.548681979 | 0.027741841 | 0.548681979 |
| MYADM | Th17 cells | -0.701936854 | 0.002436728 | 0.701936854 |
