# Supplementary material for: Identification of Diagnostic Biomarkers of Rape Pollen Allergy Based on MRNA Sequencing
Source: Hindawi journal article supplement (doi:10.1155/2022/6153577), 2022-09-28
Supplement: f1 [file 6153577.f1.zip › 6153577.f1/Table S8.docx]

**Table S8: Rape pollen allergy-associated genes with high correlation with differential immune cells**

**Symbol**

IGSF9

ZNF703

KLF4

RRP12

MYADM

LMNA

KIF9

CFAP43

ATF3

DUSP10

GPX8

ARL4A

LETM2

ANXA1

KLF6

DDIT3

RGCC

CFAP20

PMAIP1

CYP2F1

MLF1

CD69

IFNG
